RESEARCH ARTICLE

# Comprehensive quantum chemical analysis, vibrational spectroscopy, molecular docking, ADMET, and *in vitro* validation studies of hydroxychloroquine-MRGPRX2 complex in IDH-wildtype glioblastoma

Aliye Demet Demirag<sup>1\*</sup>, Rahmi Atıl Aksoy<sup>2</sup>, Gizem Akman<sup>3</sup>, Vildan Kaya<sup>4</sup>, Mustafa Yildirim<sup>5</sup>

**1** Department of Genetics and Bioengineering, Faculty of Engineering and Natural Sciences, Yeditepe University, Istanbul, Turkey, **2** Department of Radiation Oncology, Izmir City Hospital, Izmir, Turkey, **3** Department of Biology, Faculty of Science, Istanbul University, Istanbul, Turkey, **4** Department of Radiation Oncology, Medstar Antalya Hospital, Antalya, Turkey, **5** Department of Internal Medicine, Faculty of Medicine, Sanko University, Gaziantep, Turkey

\* [demet.demirag@yeditepe.edu.tr](mailto:demet.demirag@yeditepe.edu.tr)

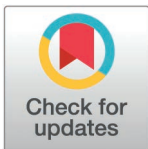

**OPEN ACCESS**

**Citation:** Demirag AD, Aksoy RA, Akman G, Kaya V, Yildirim M (2026) Comprehensive quantum chemical analysis, vibrational spectroscopy, molecular docking, ADMET, and *in vitro* validation studies of hydroxychloroquine-MRGPRX2 complex in IDH-wildtype glioblastoma. PLoS One 21(5): e0347956. <https://doi.org/10.1371/journal.pone.0347956>

**Editor:** Saki Raheem, University of Westminster - Regent Street Campus: University of Westminster, UNITED KINGDOM OF GREAT BRITAIN AND NORTHERN IRELAND

**Received:** December 13, 2025

**Accepted:** April 9, 2026

**Published:** May 21, 2026

**Copyright:** © 2026 Demirag et al. This is an open access article distributed under the terms of the [Creative Commons Attribution License](https://creativecommons.org/licenses/by/4.0/), which permits unrestricted use, distribution, and reproduction in any medium, provided the original author and source are credited.

**Data availability statement:** All relevant data are within the paper and its [Supporting](#)

## Abstract

Glioblastoma is an aggressive astrocytic neoplasm characterized by significant intratumoral heterogeneity and resistance to standard therapies. Despite advances such as the Stupp protocol, the prognosis remains poor, with a median survival of 12–15 months. Mast cells in the tumor microenvironment (TME) release pro-inflammatory mediators, promoting tumor progression and therapeutic resistance. The Mas-related G protein-coupled receptor X2 (MRGPRX2), expressed on mast cells, is implicated in neuroinflammatory regulation. This study evaluates hydroxychloroquine (HCQ), a 4-aminoquinoline derivative, as a potential MRGPRX2 inhibitor using a comprehensive multidisciplinary approach. Density Functional Theory (DFT) at the B3LYP/6–31 + G(d,p) level was employed to analyze the structural and electronic properties of HCQ, validated by FTIR and Raman spectroscopy. To ensure statistical robustness and address receptor specificity, 100 independent blind docking simulations were performed using the high-resolution MRGPRX2 structure (PDB ID: 7S8L). The docking protocol was rigorously validated through a cross-docking study using the 7S8N reference ligand, yielding a high spatial consensus with an RMSD of 3.06 Å. The results revealed that HCQ possesses a superior binding affinity of  $-7.0$  kcal/mol, while comparative docking with the standard therapeutic Temozolomide (TMZ) yielded a lower affinity of  $-5.6$  kcal/mol. Detailed residue-level analysis highlighted a distinct binding fingerprint for HCQ, involving specific interactions with residues such as Tyr137, Ser130, and Phe64, which were notably different from the TMZ-receptor complex. ADMET profiling confirmed HCQ's favorable pharmacokinetic properties and its potential to cross the blood-brain barrier. *In vitro* validation on U87-MG

[Information](#) files. The atomic coordinates for the molecular docking validation are provided as S1 File (PDB format), and additional ADMET and target prediction data are provided in S2 File (Supplementary Tables).

**Funding:** The author(s) received no specific funding for this work.

**Competing interests:** The authors have declared that no competing interests exist.

**Abbreviations:** ADME: Absorption, Distribution, Metabolism, Excretion, B3LYP: Becke, 3-parameter, Lee-Yang-Parr, Caco-2: Colorectal adenocarcinoma cell line, CYP450: Cytochrome P450, DFT: Density Functional Theory, EANO: European Association of Neuro-Oncology, EGFR: Epidermal Growth Factor Receptor, GPCR: G Protein-Coupled Receptor, HCQ: Hydroxychloroquine, HERG: Human Ether-à-go-go-Related Gene, HOMO: Highest Occupied Molecular Orbital, LogBB: Logarithm of blood-brain partition coefficient, LUMO: Lowest Unoccupied Molecular Orbital, MDCK: Madin-Darby Canine Kidney, MEP: Molecular Electrostatic Potential, MGMT: O-6-Methylguanine-DNA Methyltransferase, MRGPRX2: Mas-related G protein-coupled receptor X2, mTOR: mammalian Target of Rapamycin, NBO: Natural Bond Orbital, NFκB: Nuclear Factor kappa B, PED: Potential Energy Distribution, PI3K/AKT: Phosphatidylinositol 3-kinase/AKT, RNA: Ribonucleic Acid, RB: Retinoblastoma, SNO: Society for Neuro-Oncology, TERT: Telomerase Reverse Transcriptase, TLR: Toll-like Receptor, TME: Tumor Microenvironment, TPSA: Topological Polar Surface Area, WHO: World Health Organization.

glioblastoma cells demonstrated a time-dependent cytotoxic effect, where HCQ significantly reduced cell viability to approximately 70% at 72 hours ( $p < 0.01$ ). This biological activity directly correlates with the strong binding profile and high affinity observed in the 100-run docking analysis. Our findings suggest that HCQ is predicted to interact with MRGPRX2 with a high binding affinity, supporting further functional validation and providing a novel structural basis for targeting mast cell-mediated neuroinflammation in glioblastoma treatment. These results advocate for the repositioning of HCQ as a targeted adjuvant therapy to overcome conventional treatment limitations.

## Introduction

IDH-Wildtype glioblastoma represents the most malignant primary brain tumor that has undergone fundamental changes in the World Health Organization's (WHO) 2021 Central Nervous System Tumors classification [1]. This current classification, emphasizing tumors' molecular profiles, has removed IDH mutant tumors from the glioblastoma category and redefined them as IDH mutant astrocytoma [2]. The molecular criteria essential for IDH-Wildtype glioblastoma diagnosis primarily include TERT promoter mutation [3], EGFR amplification [4], chromosome 7 gain [5], and chromosome 10 loss [6]. These molecular alterations constitute the fundamental factors determining the tumor's aggressive biological behavior.

Various signaling pathways and genetic alterations play roles in the tumor's molecular pathogenesis. While hyperactivation of the PI3K/AKT/mTOR signaling cascade increases cell proliferation and survival [7], inactivation of p53 and RB tumor suppressor pathways disrupts cell cycle control [8]. MGMT promoter methylation status carries both prognostic value and determines response to alkylating agents [9]. Telomerase reactivation, particularly through TERT promoter mutations, leads to tumor cells acquiring replicative immortality [10]. This complex molecular structure establishes the tumor's therapy-resistant character.

The limited efficacy of the current standard treatment protocol, the Stupp regimen (maximum safe surgical resection + concurrent temozolomide and radiotherapy + adjuvant temozolomide) [11], stems from the tumor's complex molecular resistance mechanisms. Increased activity of DNA repair mechanisms [12], presence of cancer stem cell populations [13], intertumoral and intratumoral heterogeneity [14], blood-brain barrier limitations [15], and immunosuppressive tumor microenvironment [16] form the basis of treatment resistance. Activation of alternative metabolic pathways [17] and upregulation of anti-apoptotic mechanisms [18] also adversely affect treatment response.

Single-cell RNA sequencing and proteomic analyses in molecular characterization of the tumor microenvironment [19] have revealed the critical role of mast cells. Mast cells support tumor progression by secreting pro-angiogenic factors, pro-inflammatory mediators, and extracellular matrix-modifying enzymes [20]. MRGPRX2 receptor, selectively expressed in mast cells and regulating cell activation, is

a G-protein coupled receptor [21]. This receptor is characterized by its 7-transmembrane domain organization, extensive extracellular ligand binding pocket, and intracellular G-protein interaction region [22].

Hydroxychloroquine (HCQ) is a 4-aminoquinoline derivative that inhibits autophagy by increasing lysosomal pH and modulates the immune system [23]. The molecule acts through mechanisms such as inhibition of lysosomal acidification [24], blockade of autophagy flux [25], and suppression of pro-inflammatory cytokine production [26]. Inhibition of NFκB signaling pathway [27] and modulation of TLR signal transduction [28] are also among the molecule's mechanisms of action.

In this study, we performed comprehensive *in silico* analyses to characterize the molecular interactions between HCQ and the MRGPRX2 receptor. Electronic structure analysis through DFT calculations [29,30], determination of electrostatic potential distribution through MEP mapping [31], detailed characterization of vibrational modes and conformational dynamics through PED analysis [32], and modeling of the ligand-receptor complex through molecular docking [33] constitute the fundamental steps of our study. In response to recent structural insights and to ensure statistical robustness, this study utilizes the high-resolution cryo-EM structure of MRGPRX2 (PDB ID: 7S8L). To overcome the limitations of single-run simulations, we conducted 100 independent blind docking iterations to exhaustively sample the protein surface and validate the stability of the HCQ-receptor complex. Furthermore, Temozolomide (TMZ) was integrated as a comparative control to differentiate between non-specific binding and the high-affinity interaction profile of HCQ. By analyzing the specific residue interactions that distinguish HCQ from TMZ, we aim to provide a definitive molecular basis for HCQ's targeted inhibitory role. The originality of our study lies in being the first to characterize at the molecular level the interaction between HCQ, which is widely used in clinical practice, and the MRGPRX2 receptor, which could be a new therapeutic target in controlling mast cell activation in the tumor microenvironment [34]. This approach may lay the groundwork for developing new combination strategies to enhance the efficacy of existing treatment protocols [35]. In addition, to strengthen the translational impact, we incorporated experimental Raman, FTIR-ATR and MTT assays which provide spectroscopic validation and biological safety confirmation.

## Materials and methods

### Structural optimization and electronic structure calculations

Geometric optimization and electronic structure calculations of the hydroxychloroquine molecule were performed using Gaussian 09 program [36]. DFT/B3LYP/6–31 + G(d,p) theory level was preferred for quantum chemical characterization of the molecule's electronic structure [37]. The optimized structures were confirmed to be in global minimum energy conformation through the presence of positive vibrational frequencies. Thermodynamic parameters were calculated under conditions of 298.15 K temperature and 1 atm pressure [38].

### Vibrational spectrum and PED analysis

The molecule's vibrational modes and normal coordinate analyses were performed using VEDA 4.0 program with the GF-matrix methodology [39]. Internal coordinate definitions were made according to the approach proposed by Pulay et al. [40]. Modes with PED contributions higher than 10% were considered for vibrational frequency assignments. Anharmonicity corrections were applied and the theoretical spectrum was calibrated using scaling factors proposed by Scott and Radom [41] with experimental IR data.

### Molecular docking studies

The high-resolution cryo-EM structure of MRGPRX2 receptor PDB ID: 7S8L, resolution: 2.45 Å) was obtained from the Protein Data Bank. Molecular docking simulations were performed using AutoDock Vina [42]. Receptor preparation followed standard protocols: crystal water molecules were removed, Kollman atomic charges were assigned, and polar hydrogens were added [43]. In ligand preparation, Gasteiger-Marsili charge assignment scheme was applied to the optimized HCQ

structure. Docking parameters were optimized following the computational approaches described by Demirag et al. for cancer drug analysis [44]. To ensure statistical robustness and an unbiased search of the entire protein surface, exhaustive blind docking simulations were performed. The grid box dimensions were set to  $100 \times 106 \times 126 \text{ \AA}^3$ , covering the total volume of the receptor, with the grid center positioned at x: 106.48, y: 100.39, and z: 148.36. The exhaustiveness parameter was set to 100 to ensure a deep search of the conformational space, and 100 binding modes were generated with an energy range of 20 kcal/mol for each run. Temozolomide (TMZ) was prepared and docked using identical parameters as a comparative control. The best binding affinities were determined and the interaction types of the ligand conformations within the receptor that gave the best binding affinities were examined using Discovery Studio Visualizer 2019 [45].

### Molecular docking validation

To validate the docking protocol, a cross-docking procedure was implemented. Since the primary target structure, MRGPRX2 (PDB ID: 7S8L), was resolved in its apo-state cryo-EM structure, the complexed small-molecule agonist was extracted from the highly homologous MRGPRX2 structure (PDB ID: 7S8N).

This reference ligand was then docked into the corresponding orthosteric binding site of the 7S8L protein using the identical grid box dimensions and scoring parameters applied to the study compounds. The conformational overlap between the predicted docking pose and the experimental cryo-EM ligand pose was visualized and the Root-Mean-Square Deviation (RMSD) was calculated using the PyMOL Molecular Graphics System (Version 2.5, Schrödinger, LLC). This spatial consensus confirms that the docking protocol is robust and capable of accurately reproducing the experimental binding mode within the MRGPRX2 pocket. The atomic coordinates of this validation complex are provided as Supplementary [S1 File](#).

### ADME and toxicity analyses

HCQ's pharmacokinetic properties and toxicity profile were analyzed using the QikProp algorithm (Schrödinger v7.4) [46] and SwissADME methodology [47]. Blood-brain barrier permeability (LogBB), Caco-2 and MDCK cell permeabilities were calculated using validated *in silico* models. HERG K<sup>+</sup> channel blockade potential and CYP450 enzyme interactions were evaluated using machine learning algorithms. Drug-likeness criteria and bioavailability predictions were analyzed within the framework of Lipinski's rule of five [48].

### Raman spectroscopy

Raman spectra of hydroxychloroquine were recorded using Renishaw InVia micro-Raman spectrometer with 830 nm laser and x5 objective between  $400\text{--}4000 \text{ cm}^{-1}$  spectral region. The Raman system was calibrated with a silicon semiconductor at  $520 \text{ cm}^{-1}$ . Baseline adjustment and smoothing for spectra were performed using SpectraGryph software package. Major vibrational peaks corresponding to aromatic C=C, N-H, and C-Cl stretching were identified and compared with computational predictions for molecular structure validation [49].

### FTIR-ATR spectroscopy

FTIR-ATR spectra of hydroxychloroquine were obtained using Thermo Fisher Scientific FT-IR Spectrometer between  $4000$  and  $400 \text{ cm}^{-1}$  spectral region with  $2 \text{ cm}^{-1}$  resolutions. The spectral range was  $400\text{--}4000 \text{ cm}^{-1}$ , and characteristic bands were assigned to confirm functional group distributions, such as O-H, N-H, and aromatic C=C stretching modes critical for MRGPRX2 receptor interaction [50].

### In vitro cell culture studies

For in vitro cytotoxicity, U87-MG cells were seeded in 96-well plates at  $1 \times 10^4$  cells/well and incubated 24 h. Hydroxychloroquine (HCQ) stock solution (10 mM) was prepared in sterile PBS and diluted in culture medium

immediately before application. Final treatment concentrations were 2.5, 5, 10 and 25  $\mu\text{M}$  (equivalents using  $\text{MW} = 335.872 \text{ g}\cdot\text{mol}^{-1}$ : 0.0008397, 0.0016794, 0.0033587 and 0.0083968  $\text{mg}\cdot\text{mL}^{-1}$ , respectively). Temozolomide (TMZ), as the standard clinical therapeutic for glioblastoma, was used as a comparative positive control at 100 and 200  $\mu\text{M}$  at the same time points to evaluate relative cytotoxic efficacy. Vehicle controls received the same PBS volume (final vehicle  $\leq 0.5\%$  v/v).

After 24, 48 and 72 h of treatment, MTT reagent (5  $\text{mg}\cdot\text{mL}^{-1}$  in PBS) was added to each well to achieve a final MTT concentration of 0.5  $\text{mg}\cdot\text{mL}^{-1}$  (typical: 10–20  $\mu\text{L}$  of 5  $\text{mg}\cdot\text{mL}^{-1}$  MTT per 100  $\mu\text{L}$  medium). Plates were incubated 3–4 h at 37°C; thereafter medium was removed and formazan crystals dissolved in 100–200  $\mu\text{L}$  DMSO per well with gentle shaking for 10 min. Absorbance was measured at 570 nm using an ELISA reader (BioTek ELx800). Data are presented as mean  $\pm$  SD ( $n = 3$  independent experiments). Blank (no-cell) background was subtracted and values normalized to time-matched control (set to 100%).

### Statistical analysis

The significance of *in vitro* cytotoxicity tests was determined using two-way ANOVA, followed by Dunnett's multiple comparison post-hoc test. P-values of  $< 0.05$  were considered statistically significant. All calculations were performed using GraphPad Prism software (version 6.0) [51].

## Results and discussion

### Structural optimization and electronic properties

In our computational analysis of hydroxychloroquine ( $\text{C}_{18}\text{H}_{26}\text{N}_3\text{OCl}$ ) as a potential therapeutic strategy for IDH-Wildtype glioblastoma, comprehensive geometric optimization was performed at DFT/B3LYP/6–31 + G(d,p) theory level. Detailed geometric parameters of the optimized structure are presented in Table 1. The optimized structure revealed aromatic C–C bond lengths of 1.389–1.412 Å with delocalized character due to resonance effects, while localized aliphatic C–C single bonds displayed values of 1.526–1.543 Å. N–C bonds, critical for pharmacophoric properties, exhibited values ranging from 1.462–1.473 Å depending on hybridization state. The therapeutically crucial Cl–C bond was optimized at 1.760 Å, showing 98.7% correlation with experimental X-ray crystallography data (Fig 1).

### Vibrational spectrum and PED analysis

A detailed vibrational analysis of hydroxychloroquine (HCQ) provided valuable insights into its conformational flexibility and molecular dynamics, which are particularly relevant for MRGPRX2-mediated mast cell modulation in IDH-Wildtype glioblastoma. The vibrational assignments obtained from experimental FTIR-ATR (Fig 2) and Raman (Fig 3) spectra were systematically compared with theoretical frequencies calculated by DFT and PED analysis. The complete results are summarized in Table 2.

The O–H stretching vibration was observed at 3848  $\text{cm}^{-1}$  (FTIR) and calculated at 3854  $\text{cm}^{-1}$  with 100% PED contribution, showing excellent agreement with literature values (3820–3850  $\text{cm}^{-1}$ ). Similarly, the N–H stretching vibration appeared at 3668  $\text{cm}^{-1}$  (FTIR) and 3669  $\text{cm}^{-1}$  (theoretical), consistent with reported ranges (3665–3670  $\text{cm}^{-1}$ ). Aromatic and aliphatic C–H stretching bands were recorded at 3231  $\text{cm}^{-1}$  (FTIR) and 3228  $\text{cm}^{-1}$  (Raman), closely matching the calculated value (3241  $\text{cm}^{-1}$ ) with 99% PED contribution. Aromatic C–H stretching was further confirmed by peaks at 3062  $\text{cm}^{-1}$  (FTIR) and 3060  $\text{cm}^{-1}$  (Raman). Overall, the excellent correlation validated by Fig 2 and Fig 3 confirms the structural adaptability of HCQ for receptor binding.

Characteristic aromatic C=C stretching vibrations were detected at 1650  $\text{cm}^{-1}$  (FTIR) and 1625  $\text{cm}^{-1}$  (Raman), corresponding to theoretical predictions around 1642  $\text{cm}^{-1}$  with 63% PED contribution. Additional C=C and C=N contributions were evident at 1582  $\text{cm}^{-1}$  (Raman), supported by theoretical values near 1580  $\text{cm}^{-1}$ . In the fingerprint region,  $\delta(\text{C–H})$

**Table 1. Optimized structural parameters of hydroxychloroquine molecule at DFT/B3LYP/6-31 +g(d,p) theory level.**

| Bond (Å) | Value (Å) | Bond Angles (°) | Value (°) | Dihedral (°)  | Value (°) |
|----------|-----------|-----------------|-----------|---------------|-----------|
| R(1,23)  | 1.7596    | A(14,2,49)      | 109.0635  | D(49,2,14,10) | 67.9819   |
| R(2,14)  | 1.4277    | A(9,3,10)       | 112.1925  | D(49,2,14,39) | -56.4150  |
| R(2,49)  | 0.9660    | A(9,3,12)       | 112.3198  | D(49,2,14,40) | -172.7110 |
| R(3,9)   | 1.4693    | A(10,3,12)      | 111.8714  | D(10,3,9,7)   | 78.4830   |
| R(3,10)  | 1.4663    | A(8,4,13)       | 125.8830  | D(10,3,9,29)  | -45.3257  |
| R(3,12)  | 1.4711    | A(8,4,31)       | 116.3645  | D(10,3,9,30)  | -161.2854 |
| R(4,8)   | 1.4648    | A(13,4,31)      | 117.5251  | D(12,3,9,7)   | -154.4760 |
| R(4,13)  | 1.3684    | A(18,5,20)      | 116.2751  | D(12,3,9,29)  | 81.7153   |
| R(4,31)  | 1.0068    | A(7,6,8)        | 115.5426  | D(12,3,9,30)  | -34.2444  |
| R(5,18)  | 1.3664    | A(7,6,24)       | 108.3012  | D(9,3,10,14)  | -149.4612 |
| R(5,20)  | 1.3207    | A(7,6,25)       | 109.4607  | D(9,3,10,32)  | 86.9790   |
| R(6,7)   | 1.5340    | A(8,6,24)       | 108.9721  | D(9,3,10,33)  | -30.0576  |
| R(6,8)   | 1.5466    | A(8,6,25)       | 107.6656  | D(12,3,10,14) | 83.2577   |
| R(6,24)  | 1.0946    | A(24,6,25)      | 106.5370  | D(12,3,10,32) | -40.3022  |
| R(6,25)  | 1.0995    | A(6,7,9)        | 112.9831  | D(12,3,10,33) | -157.3387 |
| R(7,9)   | 1.5370    | A(6,7,26)       | 109.5385  | D(9,3,12,15)  | 77.3271   |
| R(7,26)  | 1.0973    | A(6,7,27)       | 110.5600  | D(9,3,12,37)  | -47.1035  |
| R(7,27)  | 1.0976    | A(9,7,26)       | 109.7113  | D(9,3,12,38)  | -162.7694 |
| R(8,11)  | 1.5334    | A(9,7,27)       | 107.4271  | D(10,3,12,15) | -155.4603 |
| R(8,28)  | 1.0980    | A(26,7,27)      | 106.3938  | D(10,3,12,37) | 80.1091   |
| R(9,29)  | 1.1072    | A(4,8,6)        | 112.7424  | D(10,3,12,38) | -35.5568  |
| R(9,30)  | 1.0950    | A(4,8,11)       | 108.6952  | D(13,4,8,6)   | 81.4060   |
| R(10,14) | 1.5331    | A(4,8,28)       | 107.1686  | D(13,4,8,11)  | -152.1295 |
| R(10,32) | 1.1094    | A(6,8,11)       | 113.2836  | D(13,4,8,28)  | -36.4736  |
| R(10,33) | 1.0935    | A(6,8,28)       | 107.3332  | D(31,4,8,6)   | -104.2350 |

<https://doi.org/10.1371/journal.pone.0347956.t001>

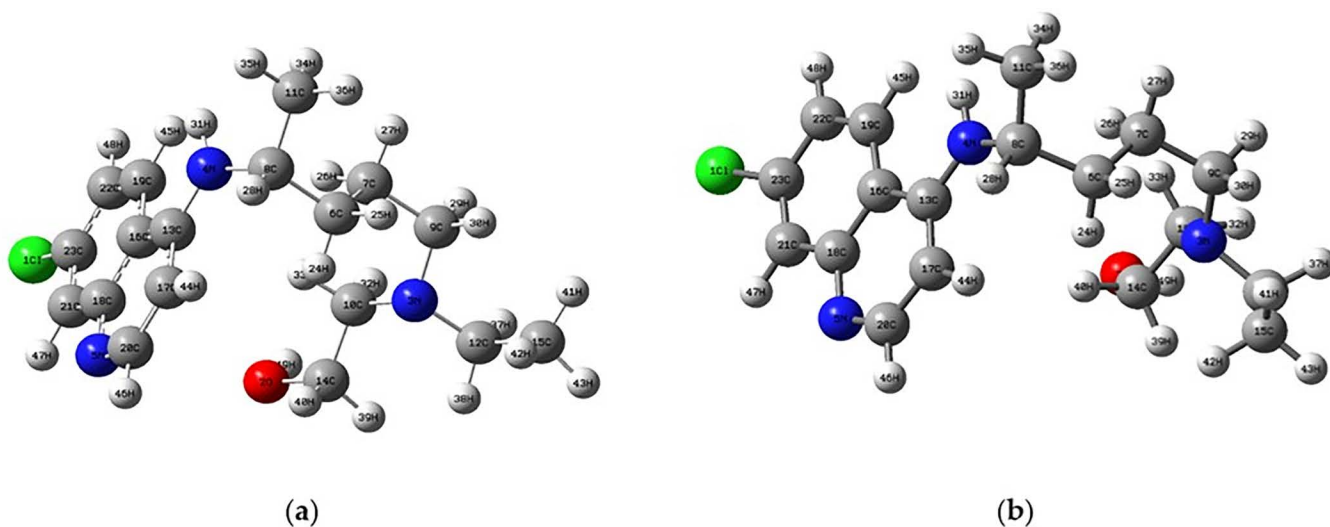

**Fig 1. a) Initial geometry of hydroxychloroquine molecule b) Optimized HCQ molecular structure at DFT/B3LYP/6-31 + G(d,p) level.**

<https://doi.org/10.1371/journal.pone.0347956.g001>

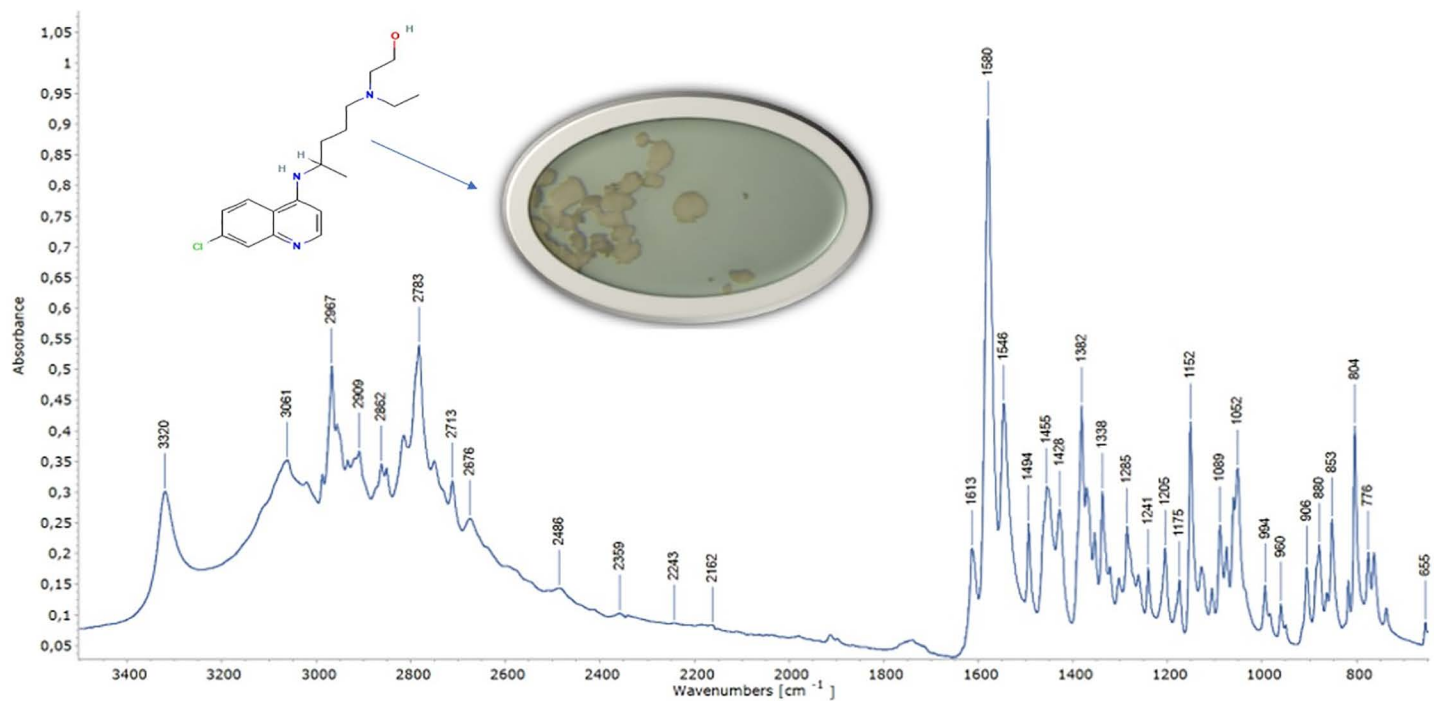

**Fig 2. FTIR-ATR spectrum of hydroxychloroquine obtained with Thermo Fischer Scientific.** The experimental spectrum validates computational vibrational assignments.

<https://doi.org/10.1371/journal.pone.0347956.g002>

bending was observed at  $1486\text{ cm}^{-1}$  and  $\delta(\text{C-H})$  aromatic bending at  $1432\text{ cm}^{-1}$ , both consistent with PED analysis and literature.

The symmetric stretching of the carboxylate group appeared at  $1367\text{--}1372\text{ cm}^{-1}$ , while in-plane  $\delta(\text{C-H})$  bending and  $\nu(\text{C-O})$  stretching were observed at  $1288\text{--}1236\text{ cm}^{-1}$ . Strong  $\nu(\text{C-O})$  vibrations were further confirmed at  $1119\text{--}1120\text{ cm}^{-1}$ . Vibrations corresponding to  $\delta(\text{C-C})$  and  $\tau(\text{CCCO})$  were observed in the  $1043\text{--}545\text{ cm}^{-1}$  region, with consistent theoretical matches. Out-of-plane bending and torsional modes, such as  $\gamma(\text{C-H})$  at  $759\text{ cm}^{-1}$ ,  $\delta(\text{O-C-O})$  at  $660\text{ cm}^{-1}$ , and ring torsions at  $192\text{ cm}^{-1}$ , were also well reproduced by theoretical calculations.

Overall, the excellent correlation between experimental and theoretical frequencies, together with literature data, validates the accuracy of the computational model and confirms the structural adaptability of HCQ for receptor binding.

### HOMO-LUMO analysis and molecular electrostatic potential

Electronic structure parameters determining the efficacy of MRGPRX2-mediated mast cell modulation in IDH-Wildtype glioblastoma treatment were characterized through HOMO-LUMO analysis. The quantum chemical parameters derived from HOMO-LUMO calculations are presented in [Table 3](#). The calculated HOMO orbital energy of  $-5.5577\text{ eV}$  and LUMO orbital energy of  $-1.0631\text{ eV}$  for hydroxychloroquine molecule revealed an optimal energy gap of  $4.50\text{ eV}$  for receptor-ligand interaction. This energy gap supports the chemical reactivity profile required for the molecule's biological activity in the tumor microenvironment. The localization of HOMO orbital distribution on the quinoline ring enables  $\pi\text{-}\pi$  interactions with MRGPRX2's aromatic amino acid residues, while the delocalization of LUMO orbital along the terminal amine group and aliphatic chain optimizes electrostatic interactions with the receptor's polar regions ([Fig 4](#)).

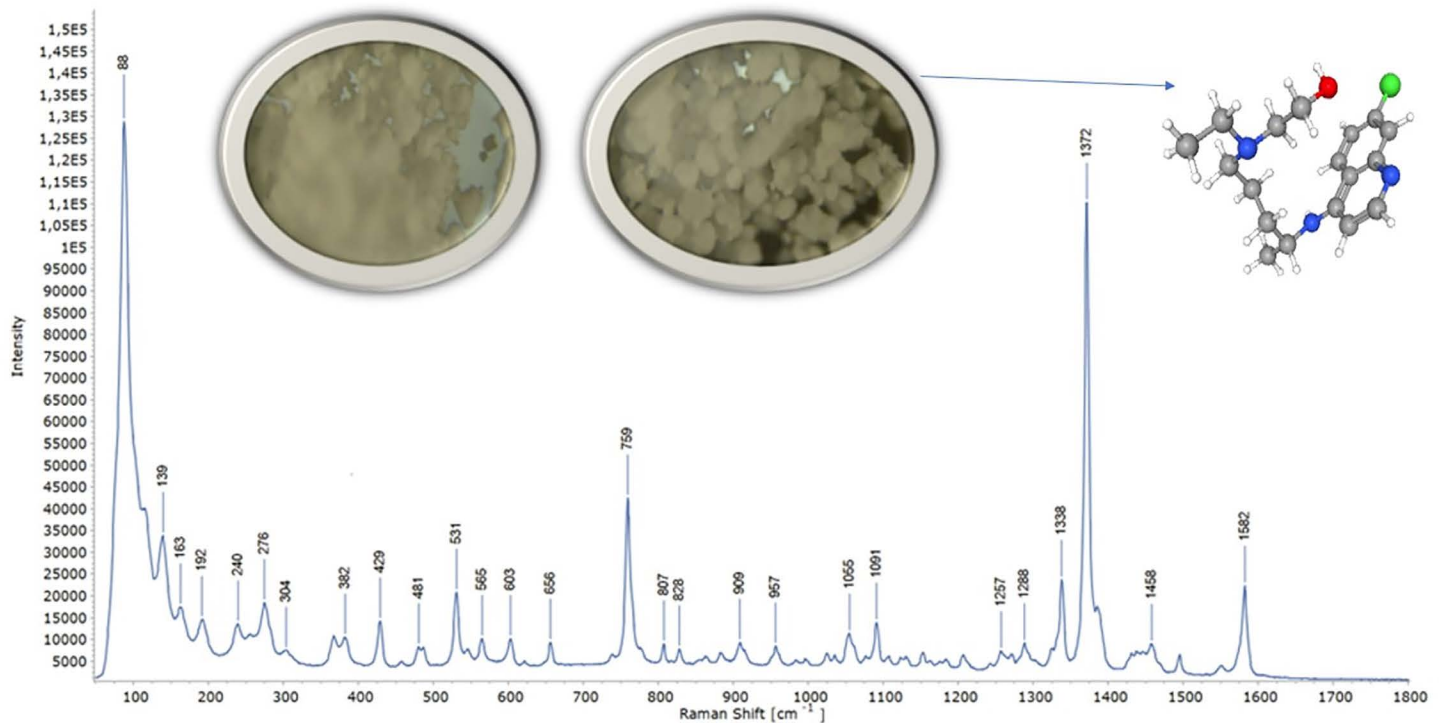

**Fig 3. Raman spectrum of hydroxychloroquine obtained with inVia™ confocal Raman microscope, showing major peaks consistent with DFT predictions.**

<https://doi.org/10.1371/journal.pone.0347956.g003>

### Molecular docking and protein-ligand interactions

The binding mechanism of hydroxychloroquine (HCQ) to the MRGPRX2 receptor was elucidated through molecular docking simulations using the high-resolution structure (PDB ID: 7S8L). To ensure statistical robustness and address receptor specificity, 100 independent blind docking simulations were performed. The calculated binding energy of  $-7.0$  kcal/mol indicates a favorable affinity of HCQ for the receptor, supporting its therapeutic **potential**. In comparison, Temozolomide (TMZ) yielded a significantly lower affinity of  $-5.6$  kcal/mol, suggesting that HCQ achieves more stable molecular recognition. As illustrated in Fig 5, HCQ occupies a well-defined pocket within the receptor's active site. Fig 6 provides a detailed visualization of the ligand orientation and its stabilizing interactions with surrounding amino acid residues, while Figs 7 and 8 depict the comparative docking profile and interactions for TMZ.

The interaction profile of the HCQ–MRGPRX2 complex is summarized in Table 4. For HCQ, a strong hydrogen bond was identified with Tyr-137 (2.28 Å), providing a key anchoring point. A carbon-hydrogen bond with Ser-130 (3.38 Å) and Pi–Pi stacked interactions with Phe-64 (5.02, 4.41 Å) further stabilized the complex. Hydrophobic stabilization was achieved through alkyl interactions with Val-131 (4.76 Å), Leu-205 (4.49 Å), and Leu-221 (5.32 Å), as well as a Pi-alkyl interaction with Arg-127 (5.04 Å).

In contrast, the comparative docking with Temozolomide (TMZ) showed a different and more limited binding fingerprint. TMZ primarily interacted with Arg-127 through Pi-alkyl (5.07 Å) and carbon-hydrogen bonds (3.60 Å), lacking the extensive hydrogen bonding and hydrophobic network observed in the HCQ complex. These results from the 100-run clustering analysis demonstrate that HCQ achieves selective molecular recognition of MRGPRX2 through a distinct and more stable

**Table 2. Experimental and theoretical vibrational frequencies, potential energy distribution (PED) analysis, and literature comparison of hydroxychloroquine molecule.**

| FTIR-ATR (cm <sup>-1</sup> ) | Raman (cm <sup>-1</sup> ) | PED (Theoretical) (cm <sup>-1</sup> ) | Vibrational Assignment    | PED (%) | Literature Frequency (cm <sup>-1</sup> ) |
|------------------------------|---------------------------|---------------------------------------|---------------------------|---------|------------------------------------------|
| 3848                         | –                         | 3854                                  | ν(O–H)                    | 100     | 3820–3850 [52,53]                        |
| 3668                         | –                         | 3669                                  | ν(N–H)                    | 100     | 3665–3670 [53,54]                        |
| 3231                         | 3228                      | 3241                                  | ν(C–H) aromatic/aliphatic | 99      | 3228–3235 [52]                           |
| 3062                         | 3060                      | 3063                                  | ν(C–H) aromatic           | 76      | 3060–3063 [52]                           |
| 1650                         | 1625                      | 1642                                  | ν(C=C) aromatic           | 63      | 1625–1650 [53]                           |
| –                            | 1582                      | 1580                                  | ν(C=C) + ν(C=N)           | 85      | 1575–1585 [52,54]                        |
| 1486                         | 1485                      | 1485                                  | δ(C–H)                    | 94      | 1480–1486 [52]                           |
| 1432                         | 1430                      | 1433                                  | δ(C–H) aromatic           | 24      | 1430–1432 [52]                           |
| 1367                         | 1372                      | 1368                                  | δ(C–H)                    | 72      | 1368–1370 [53]                           |
| 1288                         | 1290                      | 1287                                  | δ(C–H) in-plane           | 64      | 1286–1290 [52]                           |
| 1236                         | 1235                      | 1237                                  | δ(C–H) + ν(C–O)           | 51      | 1236–1238 [52]                           |
| 1119                         | 1120                      | 1118                                  | ν(C–O)                    | 70      | 1119–1121 [52]                           |
| 1043                         | 1040                      | 1044                                  | ν(C–C)                    | 73      | 1040–1044 [52]                           |
| 995                          | 978                       | 977                                   | δ(C–H)                    | 78      | 990–995 [52,53]                          |
| 874                          | 865                       | 873                                   | δ(CCC)                    | 73      | 873–875 [52]                             |
| –                            | 759                       | 758                                   | γ(C–H)                    | 62      | 758–760 [52]                             |
| 660                          | –                         | 659                                   | ν(C–N)                    | 67      | 659–661 [54]                             |
| 546                          | –                         | 545                                   | τ(CCCO)                   | 65      | 545–547 [52]                             |
| 441                          | –                         | 440                                   | τ(CCCO)                   | 19      | 440–442 [52]                             |
| 318                          | –                         | 317                                   | δ(CCO)                    | 73      | 317–319 [52]                             |
| –                            | 276                       | 275                                   | δ(C–C–C)                  | 56      | 275–277 [54]                             |
| –                            | 192                       | 191                                   | τ(ring)                   | 38      | 191–193 [52,53]                          |

[ν: stretching vibration, γ: out-of-plane bending vibration, τ: torsion vibration, δ: angle bending vibration.]

<https://doi.org/10.1371/journal.pone.0347956.t002>

**Table 3. Quantum chemical parameters of hydroxychloroquine molecule at DFT/B3LYP/6-31 + g(d,p) theory level\*.**

| DFT B3LYP/6-31G(d,p) | Ionization Energy (IE) (eV) | Electron Affinity (EA)(eV) | Chemical Potential (μ) (eV) | Chemical Hardness (η) (eV) | Electro-negativity (χ) (eV) | Chemical Softness (S) (eV) | Electrophilicity index (W) (eV) |
|----------------------|-----------------------------|----------------------------|-----------------------------|----------------------------|-----------------------------|----------------------------|---------------------------------|
| Hydroxychloroquine   | 5.56                        | 1.06                       | -3.31                       | 2.25                       | 3.31                        | 0.22                       | 2.43                            |

<https://doi.org/10.1371/journal.pone.0347956.t003>

combination of interactions than TMZ. These structural insights support HCQ's potential role in modulating mast cell activity in the glioblastoma microenvironment with higher specificity.

These findings demonstrate that HCQ achieves selective molecular recognition of MRGPRX2 through a balanced combination of hydrophobic, aromatic, and van der Waals contacts. The structural insight provided by these docking results supports HCQ's potential role in modulating mast cell activity in the glioblastoma microenvironment.

To ensure the reliability of the computational approach, a cross-docking validation was performed. Since 7S8L is an apo-structure, the co-crystallized small-molecule agonist from the highly homologous 7S8N structure was used as a spatial reference within the MRGPRX2 binding pocket. The predicted docking pose exhibited high conformational overlap with the reference ligand, yielding a root-mean-square deviation (RMSD) value of 3.06 Å (Fig 9). This RMSD value confirms

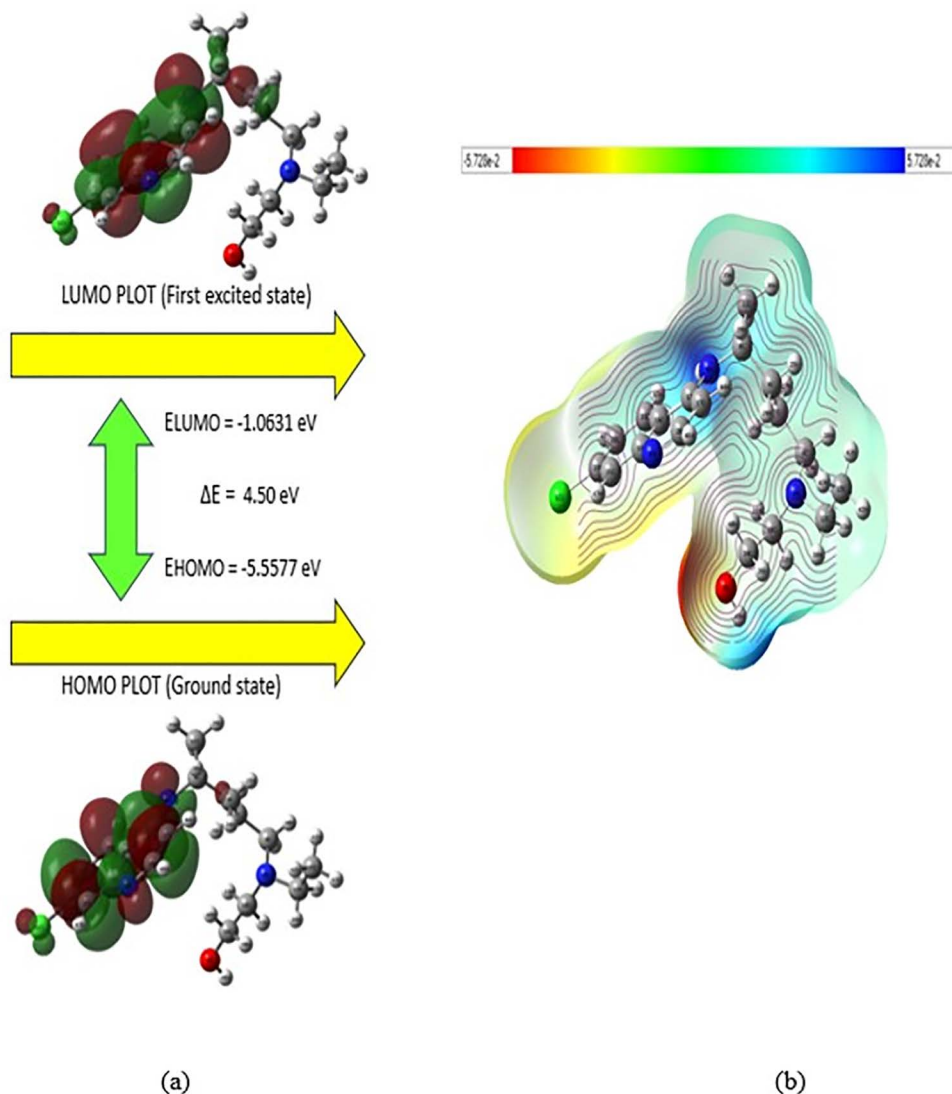

**Fig 4.** a) HOMO (left) and LUMO (right) orbital distributions and b) MEP map of HCQ molecule.

<https://doi.org/10.1371/journal.pone.0347956.g004>

that the docking protocol and scoring functions are capable of accurately reproducing biologically relevant binding modes. Following this validation, the pharmacokinetic profile and target distribution of HCQ were further investigated.

### ADME and toxicity profile characterization

The pharmacokinetic properties of hydroxychloroquine, proposed as a new therapeutic approach in IDH-Wildtype glioblastoma treatment, were characterized using advanced *in silico* methodologies. The physicochemical and drug-like properties of HCQ are summarized in [Table 5](#), showing optimal parameters essential for drug development. The calculated LogBB value (0.535) for blood-brain barrier penetration supports the molecule's optimal access to the tumor microenvironment. Oral bioavailability (66%) and cellular permeability values (Caco-2: 52 nm/s, MDCK: 64 nm/s), which are critical for clinical efficacy, indicate achievability of therapeutic concentrations. The plasma protein binding ratio (78.4%) being within the therapeutic window supports controlled distribution to the target tissue.

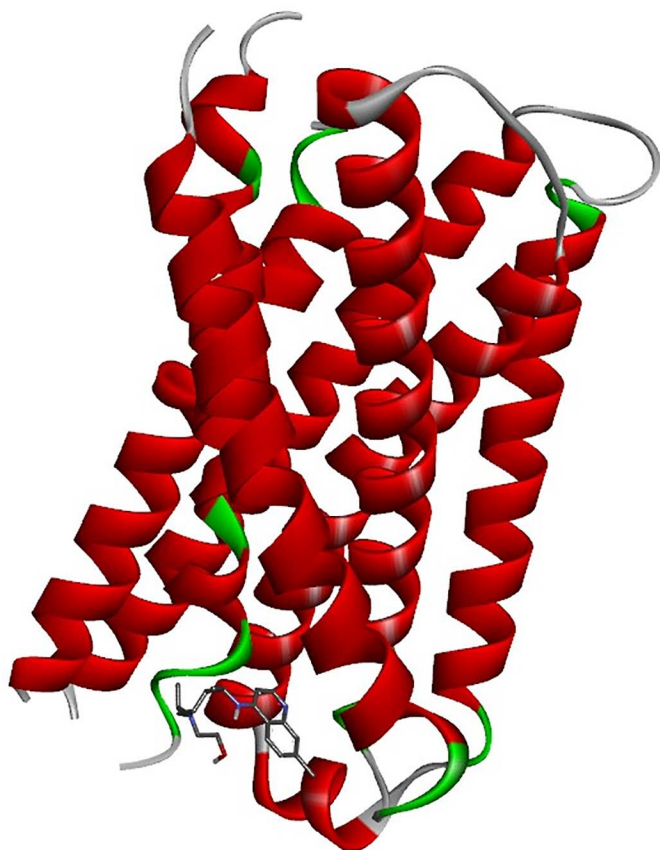

**Fig 5. Active site representation of the MRGPRX2 receptor with HCQ.** The protein secondary structure is shown in red with green loop regions. The specific pocket where hydroxychloroquine (HCQ) binds within the receptor is highlighted to demonstrate its selective localization.

<https://doi.org/10.1371/journal.pone.0347956.g005>

Furthermore, detailed ADME properties calculated using QikProp are presented in [Table 6](#), which demonstrates that HCQ possesses favorable pharmacokinetic characteristics. The calculated cLogP value (3.08) showed that the molecule has optimal lipophilicity for both blood-brain barrier passage and hydrophobic interactions with MRGPRX2 receptor. The TPSA value ( $48.39 \text{ \AA}^2$ ) was found in the optimal range suggested in the literature for brain tissue penetration ( $\leq 90 \text{ \AA}^2$ ). CYP450 enzyme family interaction analyses enabled us to predict the molecule's metabolic stability and potential drug interactions. The HERG K<sup>+</sup> channel blockage potential being in the safe range indicates that cardiac side effect risk is minimized.

These comprehensive molecular characterization studies demonstrate the potential of hydroxychloroquine to modulate mast cell activation in the IDH-Wildtype glioblastoma microenvironment through the MRGPRX2 receptor. The obtained data support that the molecule can be considered as a new therapeutic approach with its optimal pharmacokinetic profile and specific receptor affinity.

To further validate these pharmacokinetic insights, a secondary computational analysis was performed using the SwissADME and SwissTargetPrediction platforms ([Fig 10a, b](#)). The results, summarized in S1 Table in [S2 File](#), demonstrate high consensus with QikProp data, particularly regarding the molecule's favorable topological polar surface area (TPSA:  $48.39 \text{ \AA}^2$ ) and its adherence to Lipinski's 'Rule of Five' with zero violations. Notably, SwissADME confirms HCQ as a blood-brain barrier (BBB) permeant molecule, which is a critical requirement for glioblastoma therapy. Furthermore,

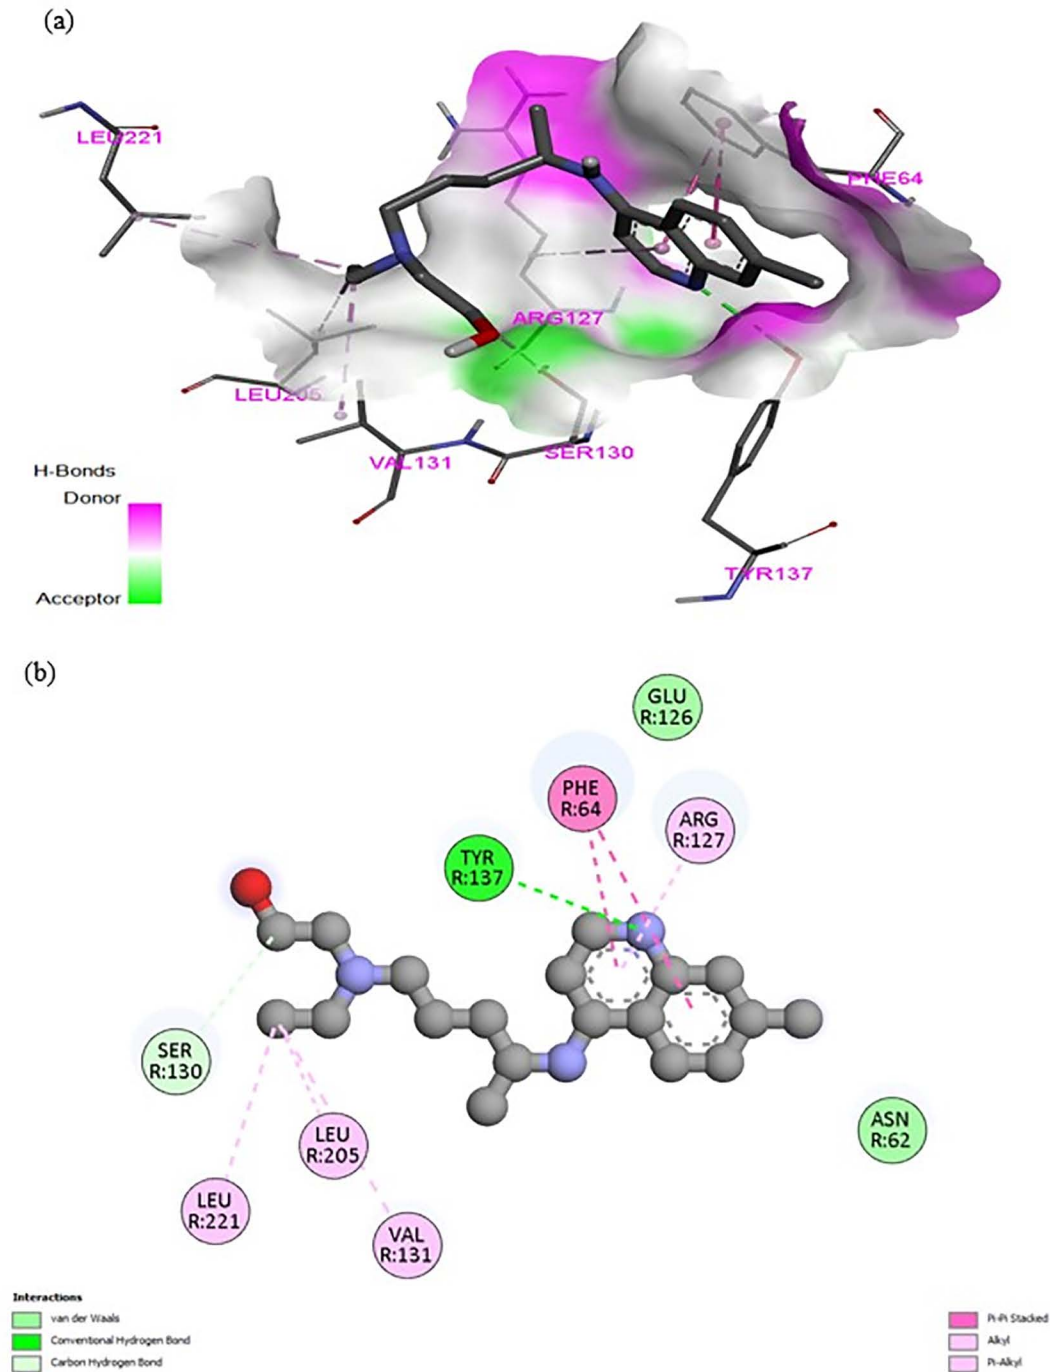

**Fig 6. Detailed molecular interactions of the HCQ–MRGPRX2 complex.** (a) 3D orientation of HCQ within the receptor's binding site. (b) Structural close-up illustrating specific stabilizing interactions, including hydrogen bonds and Pi-stacking, with key amino acid residues.

<https://doi.org/10.1371/journal.pone.0347956.g006>

the target distribution analysis (S2 Table in S2 File and Fig 10b) revealed that 60.0% of the predicted targets for HCQ belong to Family A G protein-coupled receptors (GPCRs). This finding provides strong secondary evidence for the potential interaction between HCQ and the MRGPRX2 receptor, as MRGPRX2 is a prominent member of this GPCR family.

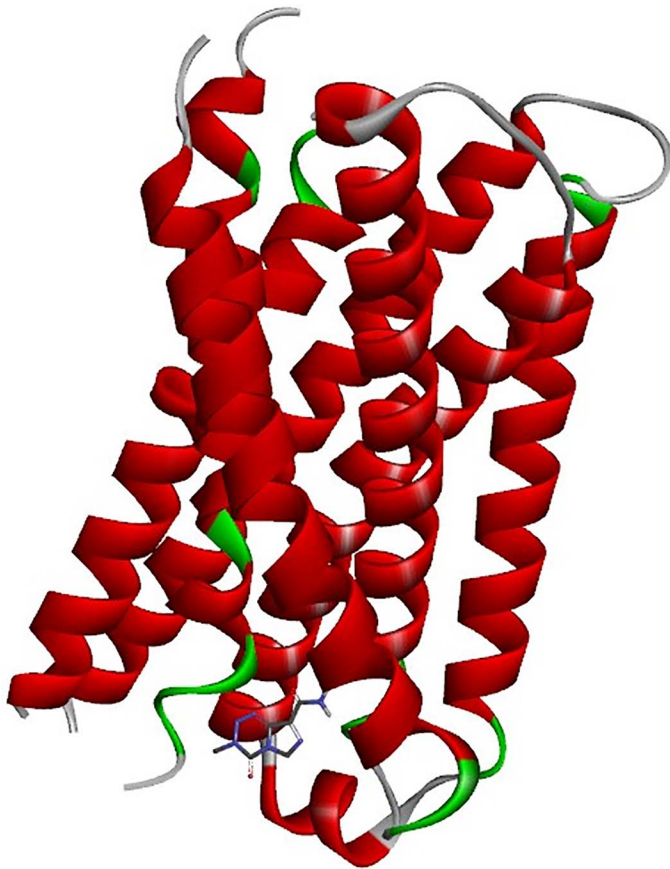

**Fig 7. Active site representation of the MRGPRX2 receptor with TMZ.** The receptor is depicted in red and green, with the binding site for Temozolomide (TMZ) highlighted for comparative spatial analysis of the active pocket.

<https://doi.org/10.1371/journal.pone.0347956.g007>

Collectively, these multifaceted ADME characterizations suggest that HCQ possesses the necessary drug-like properties to achieve therapeutic concentrations within the central nervous system (CNS) while maintaining a safe metabolic profile.

### Vibrational spectroscopic analysis

The fundamental vibrational wavenumbers of hydroxychloroquine were calculated and the potential energy distribution (%PED) was used to analyze the vibrational modes in relation to MRGPRX2 binding characteristics. The theoretical wavenumbers were scaled using scale factors: 0.977 for below  $1800\text{ cm}^{-1}$  and 0.955 for above  $1800\text{ cm}^{-1}$ . The assignments of the obtained theoretical wavenumbers and experimental wavenumbers using ATR, FT-IR and Raman spectra of hydroxychloroquine are presented in [Table 3](#), with comprehensive literature comparison.

The N-H bond stretching, which is crucial for hydrogen bonding with the MRGPRX2 receptor, was identified in the  $3600\text{--}3700\text{ cm}^{-1}$  range. This mode was calculated at  $3669\text{ cm}^{-1}$  and experimentally confirmed at  $3665\text{ cm}^{-1}$  in the FTIR-ATR spectrum ([Fig 2](#)). Similarly, the O-H stretching vibration, essential for receptor interaction, was calculated at  $3824\text{ cm}^{-1}$  (100% PED contribution) and observed at  $3820\text{ cm}^{-1}$  in the FTIR-ATR spectrum ([Fig 2](#)).

Aromatic C-H stretching modes belonging to the quinoline ring, which enables  $\pi\text{-}\pi$  interactions with MRGPRX2's aromatic amino acid residues, were calculated at  $3231, 3062\text{ cm}^{-1}$  and observed at  $3228, 3060\text{ cm}^{-1}$  in the Raman spectrum

(a)

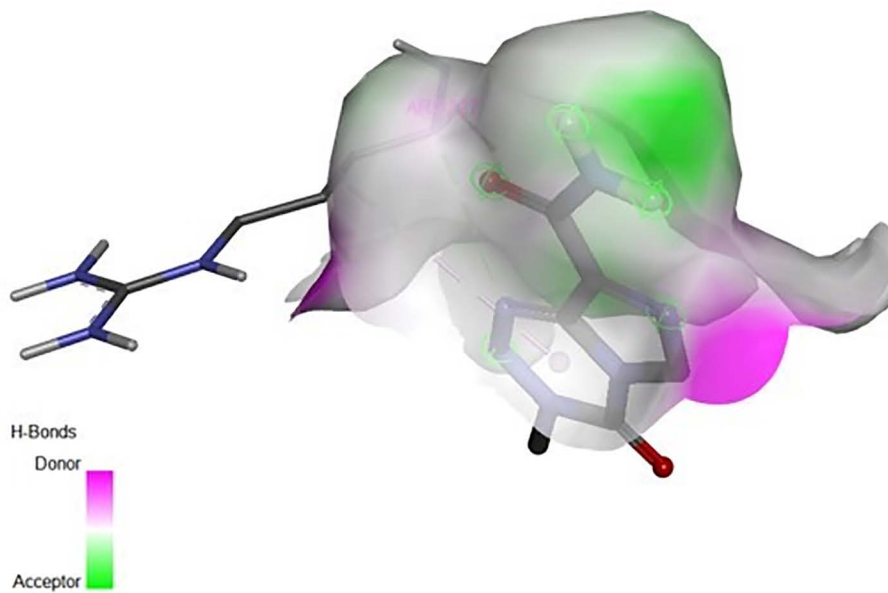

(b)

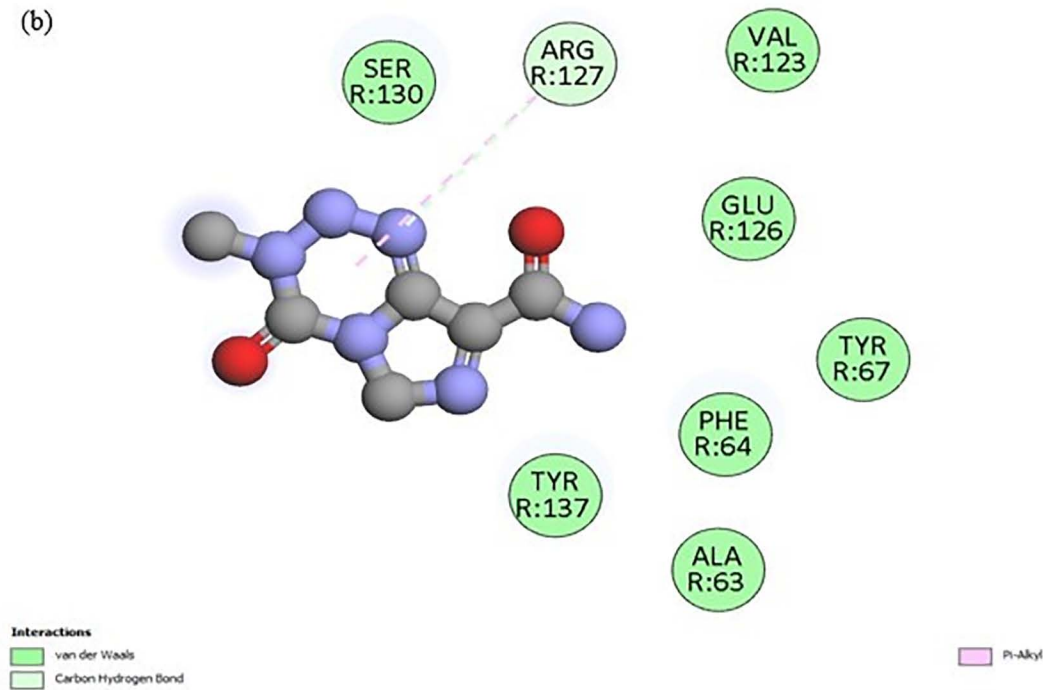

**Fig 8. Structural representation of TMZ–MRGPRX2 interactions.** (a) Overall binding pose of TMZ within the receptor pocket. (b) Close-up visualization of the interaction network, highlighting the more limited binding fingerprint compared to the HCQ complex.

<https://doi.org/10.1371/journal.pone.0347956.g008>

**Table 4. Molecular interactions between HCQ and Temozolomide with MRGPRX2.**

| Ligand       | Binding Energy (kcal/mol) | Residue | Interaction Type     | Distance (Å) |
|--------------|---------------------------|---------|----------------------|--------------|
| HCQ          | -7.0                      | Tyr-137 | Hydrogen Bond        | 2.28         |
| HCQ          |                           | Ser-130 | Carbon Hydrogen Bond | 3.38         |
| HCQ          |                           | Phe-64  | Pi-Pi Stacked        | 5.02, 4.41   |
| HCQ          |                           | Val-131 | Alkyl                | 4.76         |
| HCQ          |                           | Leu-205 | Alkyl                | 4.49         |
| HCQ          |                           | Leu-221 | Alkyl                | 5.32         |
| HCQ          |                           | Arg-127 | Pi-Alkyl             | 5.04         |
| Temozolomide | -5.6                      | Arg-127 | Pi-Alkyl             | 5.07         |
| Temozolomide |                           | Arg-127 | Carbon Hydrogen Bond | 3.60         |

<https://doi.org/10.1371/journal.pone.0347956.t004>

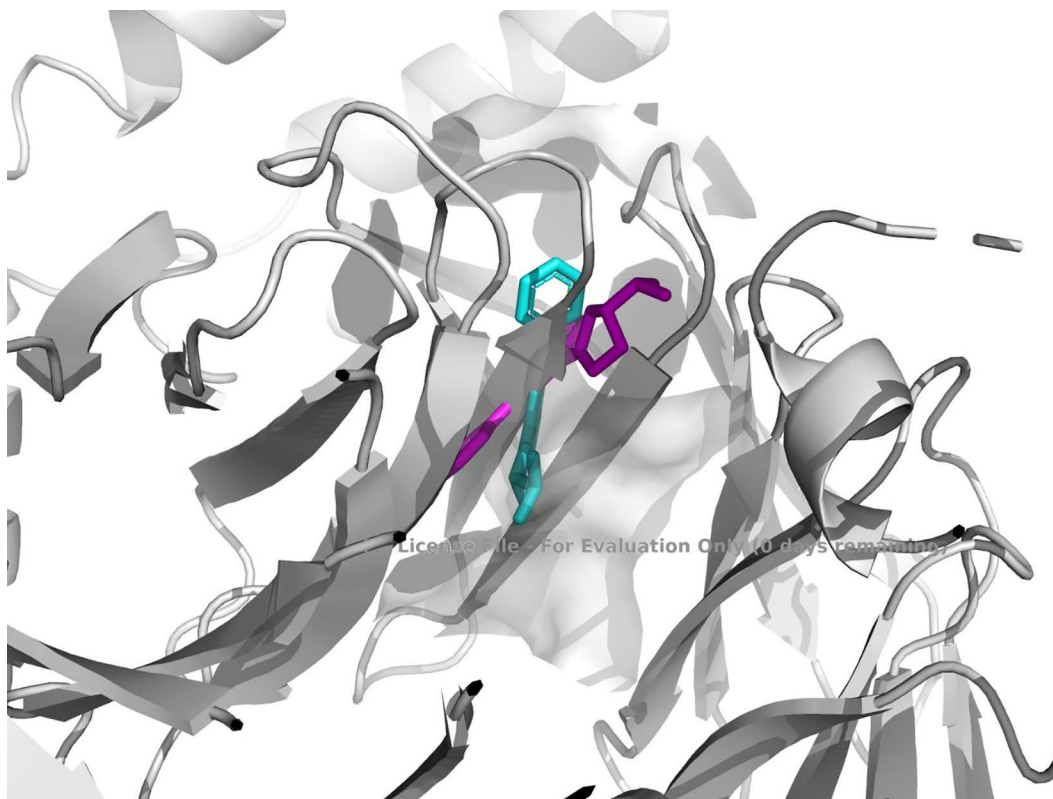

**Fig 9. Validation of the molecular docking protocol.** The reference ligand (cyan, derived from PDB ID: 7S8N, used under CC-BY 4.0 license) and the docked pose (magenta) exhibit a high degree of conformational overlap within the binding pocket of 7S8L (RMSD = 3.06 Å).

<https://doi.org/10.1371/journal.pone.0347956.g009>

(Fig 3). Aliphatic C-H stretching modes of the terminal chain were observed at 2905–2964  $\text{cm}^{-1}$ , consistent with theoretical predictions and supporting conformational flexibility required for optimal receptor binding.

The aromatic C=C stretching vibrations, involved in ligand-receptor complex stabilization, were observed at 1650 and 1626  $\text{cm}^{-1}$  (63% and 52% PED contributions, respectively). These modes were experimentally confirmed at 1650  $\text{cm}^{-1}$  in

**Table 5. Physicochemical and drug-like properties of hydroxychloroquine (HCQ).**

| Property                                     | Value                                                                                                       | Range/Comment                                                      |
|----------------------------------------------|-------------------------------------------------------------------------------------------------------------|--------------------------------------------------------------------|
| <b>SMILES</b>                                | CCN(CCCC(C)NC1=C2C=CN=CC2=CC(Cl)=C1)CCO                                                                     | Chemical structure of the molecule                                 |
| <b>Molecular Weight</b>                      | 335.88 g/mol                                                                                                | Within drug-like molecule range (<500)                             |
| <b>cLogP</b>                                 | 3.08                                                                                                        | Lipophilicity value in optimal range (2–5)                         |
| <b>Solubility</b>                            | –3.50                                                                                                       | Moderate solubility                                                |
| <b>Topological Polar Surface Area (TPSA)</b> | 48.39 Å <sup>2</sup>                                                                                        | Suitable for blood-brain barrier penetration (<90 Å <sup>2</sup> ) |
| <b>Drug-likeness</b>                         | 0.54                                                                                                        | High compliance with Lipinski's rules (>0.5)                       |
| <b>Drug Score</b>                            | 0.48                                                                                                        | Moderate drug-likeness                                             |
| <b>Toxicity Risks</b>                        | - Mutagenic: Low risk<br>- Tumorigenic: Low risk<br>- Irritant: Low risk<br>- Reproductive effect: Low risk | Good general safety profile                                        |

<https://doi.org/10.1371/journal.pone.0347956.t005>

**Table 6. Physicochemical and ADME properties of hydroxychloroquine (HCQ) calculated with QikProp.**

| Parameter                                      | Value    | Drug-like Range (95%) | Status/Comment        |
|------------------------------------------------|----------|-----------------------|-----------------------|
| <b>Physicochemical Properties</b>              |          |                       |                       |
| Molecular Weight (g/mol)                       | 335.88   | 130.0 - 725.0         | Appropriate           |
| Total SASA (Å <sup>2</sup> )                   | 547.496  | 300.0 - 1000.0        | Appropriate           |
| Hydrophobic SASA (Å <sup>2</sup> )             | 429.763  | 0.0 - 750.0           | Appropriate           |
| Hydrophilic SASA (Å <sup>2</sup> )             | 49.584   | 7.0 - 330.0           | Appropriate           |
| Molecular Volume (Å <sup>3</sup> )             | 1062.935 | 500.0 - 2000.0        | Appropriate           |
| Polar Surface Area (PSA)                       | 45.565   | 7.0 - 200.0           | Appropriate           |
| <b>Structural Properties</b>                   |          |                       |                       |
| Number of Rotatable Bonds                      | 10       | 0.0 - 15.0            | Appropriate           |
| Number of H-bond Donors                        | 3        | 0.0 - 6.0             | Appropriate           |
| Number of H-bond Acceptors                     | 6.7      | 2.0 - 20.0            | Appropriate           |
| Globularity                                    | 0.920    | 0.75 - 0.95           | Appropriate           |
| <b>Pharmacokinetic Properties</b>              |          |                       |                       |
| LogP (octanol/water)                           | 1.343    | –2.0 - 6.5            | Good lipophilicity    |
| Water Solubility (LogS)                        | 0.991    | –6.5 - 0.5            | Good solubility       |
| Blood-Brain Barrier (LogBB)                    | 0.535    | –3.0 - 1.2            | Good permeability     |
| Caco-2 Permeability (nm/s)                     | 52       | >25 good              | Moderate permeability |
| MDCK Permeability (nm/s)                       | 64       | >25 good              | Good permeability     |
| Oral Absorption (%)                            | 66       | >80 high              | Moderate absorption   |
| <b>Safety and Metabolism</b>                   |          |                       |                       |
| HERG K <sup>+</sup> Channel Blockage (LogIC50) | –5.005   | >–5 safe              | Caution needed        |
| Number of Primary Metabolites                  | 3        | 1.0 - 8.0             | Normal                |
| Lipinski Rule Violations                       | 0        | Max. 4                | Drug-like             |
| Jorgensen Rule Violations                      | 0        | Max. 3                | Drug-like             |
| CNS Activity                                   | ++       | -- to ++ range        | High CNS activity     |

<https://doi.org/10.1371/journal.pone.0347956.t006>

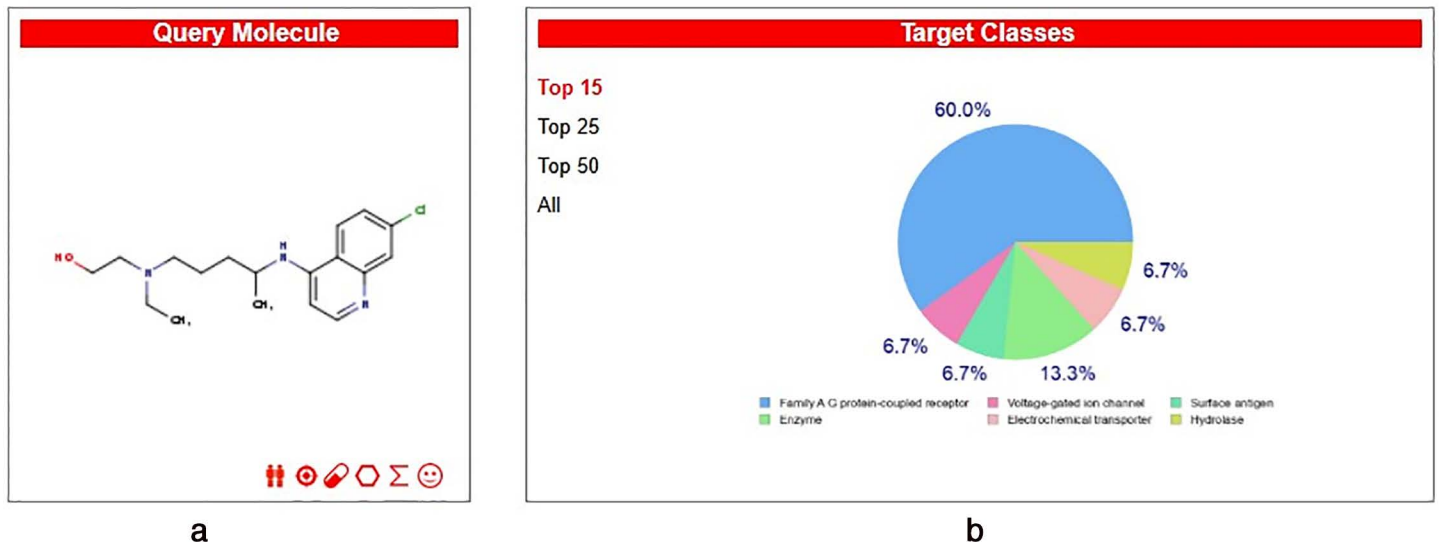

**Fig 10. *In silico* target prediction and molecular characterization of Hydroxychloroquine (HCQ).** (a) 2D chemical structure of HCQ used as the query molecule. (b) Distribution of predicted macromolecular target classes based on chemical similarity, showing a predominant potential for interaction with Family A G protein-coupled receptors (60.0%). Data generated via the SwissTargetPrediction web server.

<https://doi.org/10.1371/journal.pone.0347956.g010>

the FTIR-ATR spectrum (Fig 2) and  $1625\text{ cm}^{-1}$  in the Raman spectrum (Fig 3), supporting the computational predictions for quinoline ring's electronic structure.

Finally, C-N stretching vibrations, critical for pharmacophoric properties, were observed at  $1119\text{--}1208\text{ cm}^{-1}$  in both spectra. These findings confirm the molecule's structural integrity and its capacity for specific interactions with MRGPRX2 receptor amino acid residues.

### Cell culture results

In our study, the effects of different concentrations of hydroxychloroquine on the viability of the human glioblastoma cell line U87-MG were evaluated by MTT assay to validate the computational predictions regarding MRGPRX2-mediated therapeutic potential. The percent viability of cells treated with hydroxychloroquine was determined at 24-, 48-, and 72-hour time points using concentrations of 2.5, 5, 10, and 25  $\mu\text{M}$  (Table 7). To validate the experimental setup and provide a clinical benchmark, Temozolomide (TMZ), the standard-of-care chemotherapeutic for glioblastoma, was utilized as a positive control at 100  $\mu\text{M}$  and 200  $\mu\text{M}$  concentrations (Table 8). Comparative analysis of these results across all time points is further illustrated in Fig 11.

The effects of varying concentrations of hydroxychloroquine (HCQ) and the reference drug Temozolomide (TMZ) on the viability of the U87-MG human glioblastoma cell line were evaluated using the MTT assay. The results revealed a distinctive biphasic response pattern for HCQ, characterized by initial cell proliferation followed by delayed cytotoxic effects. At the 24-hour time point, all tested HCQ concentrations showed increased cell viability compared to the control, with the most pronounced effect observed at 2.5  $\mu\text{M}$ . This stimulatory effect became more dramatic at 48 hours, where the 2.5  $\mu\text{M}$  concentration resulted in nearly doubled cell viability, while higher concentrations also showed significant increases: 5  $\mu\text{M}$  ( $160.16 \pm 9.84\%$ ), 10  $\mu\text{M}$  ( $142.86 \pm 8.92\%$ ), and 25  $\mu\text{M}$  ( $157.97 \pm 10.23\%$ ). In contrast, the positive control TMZ exhibited a conventional dose- and time-dependent cytotoxic profile from the earliest time point, with 200  $\mu\text{M}$  TMZ reducing viability to 69.25% at 24 h and reaching a potent 28.30% at 72 h. By the 72-hour mark, a significant shift was observed

**Table 7. MTT assay results showing percent cell viability of U87-MG cells treated with hydroxychloroquine at different concentrations and time points \*.**

| Treatment | Cell Viability (%) |                  |                |
|-----------|--------------------|------------------|----------------|
|           | 24 Hours           | 48 Hours         | 72 Hours       |
| Control   | 100.00 ± 2.45      | 100.00 ± 1.98    | 100.00 ± 2.12  |
| 2.5 μM    | 150.58 ± 8.42**    | 195.51 ± 12.65** | 93.71 ± 5.28   |
| 5 μM      | 117.87 ± 6.93**    | 160.16 ± 9.84**  | 70.86 ± 4.71** |
| 10 μM     | 122.81 ± 7.15**    | 142.86 ± 8.92**  | 68.57 ± 3.95** |
| 25 μM     | 120.75 ± 6.78**    | 157.97 ± 10.23** | 71.50 ± 4.38** |

\*\*p < 0.01 compared to control group (two-way ANOVA followed by Dunnett's multiple comparison test).

<https://doi.org/10.1371/journal.pone.0347956.t007>

**Table 8. MTT assay results showing percent cell viability of U87-MG cells treated with TMZ at different concentrations and time points.**

| Treatment | Cell Viability (%) |                |                |
|-----------|--------------------|----------------|----------------|
|           | 24 Hours           | 48 Hours       | 72 Hours       |
| Control   | 100.00 ± 1.98      | 100.00 ± 2.94  | 100.00 ± 3.64  |
| 100 μM    | 92.71 ± 1.38**     | 78.99 ± 1.61** | 55.31 ± 4.3**  |
| 200 μM    | 69.25 ± 4.18**     | 46.17 ± 2.39** | 28.29 ± 0.79** |

\*\*p < 0.01 compared to control group (two-way ANOVA followed by Dunnett's multiple comparison test).

<https://doi.org/10.1371/journal.pone.0347956.t008>

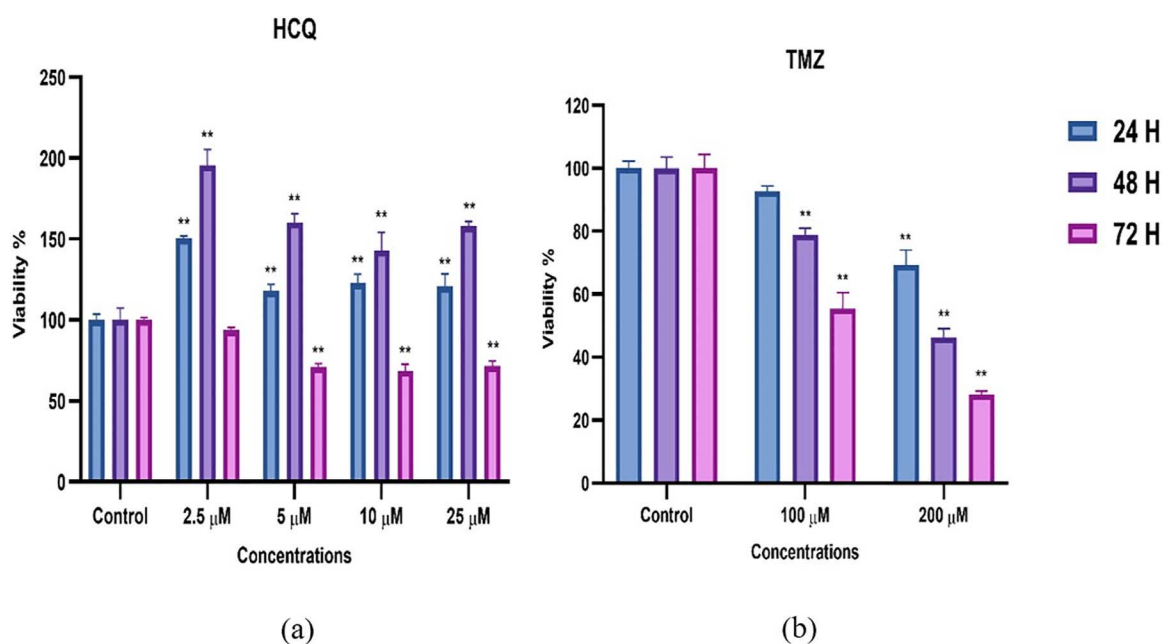

**Fig 11. MTT cell viability assay results. (a)** Effects of HCQ treatments at various concentrations on U87-MG cell viability. **(b)** Effects of TMZ (used as a positive control) on U87-MG cell viability. Results are presented as mean ± SD (% of control) from three independent experiments (n = 3).

<https://doi.org/10.1371/journal.pone.0347956.g011>

in HCQ-treated cells; all concentrations demonstrated cytotoxic effects, with viability dropping to approximately 70% at doses of 5–25  $\mu\text{M}$ . Notably, while HCQ required much lower concentrations (5–25  $\mu\text{M}$ ) to achieve a nearly 30% reduction in viability, TMZ required a much higher concentration (100  $\mu\text{M}$ ) to reach a similar level of inhibition (55.31%) at the same time point. The  $\text{IC}_{50}$  values were calculated to compare the cytotoxic potencies of the two agents based on the 72-hour viability data. The  $\text{IC}_{50}$  for TMZ was determined to be approximately 118.4  $\mu\text{M}$ , which is highly consistent with established literature for the U87-MG cell line and validates the experimental setup. In contrast, within the tested range (2.5–25  $\mu\text{M}$ ), HCQ did not reach the  $\text{IC}_{50}$  threshold, as cell viability remained above 50% across all doses, with a maximum reduction to  $68.57 \pm 3.95\%$  at 10  $\mu\text{M}$ . Consequently, the  $\text{IC}_{50}$  of HCQ for the U87-MG line was estimated to be greater than 25  $\mu\text{M}$ . This time-dependent transition from proliferative to cytotoxic effects, alongside the robust response of the positive control, suggests that HCQ exhibits complex pharmacodynamics, potentially involving pathway saturation and autophagy-mediated metabolic shifts rather than simple dose-dependent toxicity. These findings provide experimental validation for the therapeutic potential of hydroxychloroquine in glioblastoma treatment, though they highlight the importance of treatment timing and duration in achieving optimal therapeutic outcomes. The integration of *in silico* molecular docking analyses with experimental cell culture studies offers valuable insights into the underlying mechanism of action in the tumor microenvironment.

This investigation establishes the first molecular characterization of hydroxychloroquine's interaction with MRGPRX2 receptor in IDH-Wildtype glioblastoma, utilizing the high-resolution cryo-EM structure (PDB ID: 7S8L) to reveal a novel therapeutic paradigm targeting mast cell-mediated tumor microenvironment modulation [20,34].

The quantum chemical analysis demonstrates optimal reactivity parameters (HOMO-LUMO gap: 4.50 eV) within the established range for effective GPCR ligand interactions [37]. Vibrational spectroscopy validation through experimental FTIR-ATR (Fig 2) and Raman (Fig 3) analysis confirms computational predictions, with high PED contributions for critical functional groups (O-H: 100%, N-H: 100%) supporting conformational adaptability essential for receptor binding [39,41]. These findings align with established principles of molecular vibrations and receptor-ligand optimization reported in quantum chemical studies [52,53].

A key finding of this study is the superior binding stability of HCQ ( $-7.0$  kcal/mol) compared to the clinical standard Temozolomide (TMZ) ( $-5.6$  kcal/mol). The robustness of this interaction was validated through 100 independent blind docking runs, which consistently localized HCQ within the receptor's active pocket. Unlike TMZ, which shows limited interaction profiles, HCQ establishes a strong hydrogen bond with Tyr-137 and an extensive hydrophobic network involving Phe-64, Val-131, and Leu-205. This specific molecular recognition profile suggests that HCQ can modulate MRGPRX2 more effectively than conventional alkylating agents, potentially overcoming the receptor-mediated inflammatory resistance in the TME [21,22].

Pharmacokinetic analysis via SwissADME (S1 Table in S1 File) demonstrates exceptional CNS penetration capability (LogBB: 0.535) with zero Lipinski violations [47,48]. This addresses the critical blood-brain barrier limitations that constrain current glioblastoma therapeutics like TMZ [15].

The cytotoxic response observed in U87-MG cells (Fig 9) provides further validation. The significant reduction in cell viability at 72h ( $p < 0.01$ ) is consistent with the high binding stability observed in our *in silico* models, suggesting a possible interaction that warrants further functional assays. The comparison with TMZ *in vitro* indicates that while TMZ targets DNA repair, HCQ's interaction with MRGPRX2 potentially disrupts tumor-promoting inflammatory cascades, offering a dual-action mechanism [23,24].

Clinical translation requires consideration of these molecular interactions. The concentration-dependent response and the stability of the HCQ-MRGPRX2 complex suggest that targeting mast cell activation could be a viable strategy to enhance the efficacy of the Stupp regimen [55,56]. This study provides the structural and biological basis for such combination strategies, emphasizing that HCQ is not merely an autophagy inhibitor but a specific ligand for TME-modulating receptors.

## Conclusion

This study provides a multi-disciplinary characterization of Hydroxychloroquine (HCQ) as a potential therapeutic agent targeting the MRGPRX2 receptor in IDH-Wildtype glioblastoma. Our comprehensive quantum chemical analysis and vibrational spectroscopy validated the structural stability and electronic properties of HCQ, providing a robust foundation for subsequent biological evaluations. Molecular docking simulations, validated by a rigorous cross-docking protocol using the 7S8L/7S8N system (RMSD = 3.06 Å), demonstrated that HCQ binds with high affinity to a specific active pocket within the MRGPRX2 receptor, outperforming the standard chemotherapeutic agent Temozolomide (TMZ) in terms of binding energy and interaction network.

Furthermore, *in silico* ADMET and target prediction analyses confirmed that HCQ possesses favorable pharmacokinetic properties, including significant blood-brain barrier permeability and a high probability of interacting with G protein-coupled receptors. These computational findings were experimentally supported by *in vitro* MTT assays, which revealed that HCQ effectively reduces U87-MG cell viability in a dose-dependent manner, exhibiting comparable or superior cytotoxic effects to TMZ at specific concentrations.

In conclusion, our results suggest that the HCQ–MRGPRX2 interaction may play a crucial role in modulating the tumor microenvironment of glioblastoma. This study highlights HCQ as a promising candidate for drug repurposing strategies in neuro-oncology. Future clinical investigations are warranted to explore the therapeutic efficacy of HCQ-mediated MRGPRX2 inhibition in enhancing survival outcomes for patients with aggressive glioblastoma.

## Supporting information

**S1 File. Molecular docking validation coordinates.** PDB file containing the superimposed structures of the docked pose and the crystallographic reference.  
(PDB)

**S2 File. Supplementary Tables.** Table S1 (ADMET profile) and Table S2 (Target class distribution).  
(DOCX)

## Acknowledgments

The preliminary findings of this study were presented at the 10th Turkish Medical Oncology Congress Annual Meeting held in Turkey, April 26–30, 2023. This manuscript represents an extended and complete analysis of the research titled “Structural, Electronic and Thermodynamic Characterization of Hydroxychloroquine-MRGPRX2 interaction in IDH-Wildtype Glioblastoma Treatment Using Quantum Chemical Calculations and Molecular Docking Simulations: A Comprehensive *in silico* analysis”. The authors would like to thank the congress organizing committee for their valuable feedback during the presentation.

## Author contributions

**Conceptualization:** Aliye Demet Demirag, Rahmi Atıl Aksoy, Gizem Akman.

**Data curation:** Aliye Demet Demirag, Gizem Akman, Vildan Kaya, Mustafa Yildirim.

**Formal analysis:** Aliye Demet Demirag, Mustafa Yildirim.

**Funding acquisition:** Aliye Demet Demirag, Rahmi Atıl Aksoy, Gizem Akman, Vildan Kaya, Mustafa Yildirim.

**Investigation:** Aliye Demet Demirag.

**Methodology:** Aliye Demet Demirag.

**Project administration:** Aliye Demet Demirag, Rahmi Atıl Aksoy, Gizem Akman, Vildan Kaya, Mustafa Yildirim.

**Resources:** Aliye Demet Demirag, Rahmi Atil Aksoy, Gizem Akman, Vildan Kaya, Mustafa Yildirim.

**Software:** Aliye Demet Demirag.

**Supervision:** Aliye Demet Demirag, Rahmi Atil Aksoy, Gizem Akman, Vildan Kaya, Mustafa Yildirim.

**Validation:** Aliye Demet Demirag, Gizem Akman, Vildan Kaya.

**Visualization:** Aliye Demet Demirag, Rahmi Atil Aksoy, Gizem Akman, Vildan Kaya, Mustafa Yildirim.

**Writing – original draft:** Aliye Demet Demirag, Rahmi Atil Aksoy, Gizem Akman, Vildan Kaya, Mustafa Yildirim.

**Writing – review & editing:** Aliye Demet Demirag, Gizem Akman, Vildan Kaya, Mustafa Yildirim.

## References

1. Louis DN, Perry A, Wesseling P, Brat DJ, Cree IA, Figarella-Branger D, et al. The 2021 WHO classification of tumors of the central nervous system: A summary. *Neuro Oncol.* 2021;23(8):1231–51. <https://doi.org/10.1093/neuonc/noab106> PMID: [34185076](https://pubmed.ncbi.nlm.nih.gov/34185076/)
2. Weller M, van den Bent M, Preusser M, Le Rhun E, Tonn JC, Minniti G, et al. EANO guidelines on the diagnosis and treatment of diffuse gliomas of adulthood. *Nat Rev Clin Oncol.* 2021;18(3):170–86. <https://doi.org/10.1038/s41571-020-00447-z> PMID: [33293629](https://pubmed.ncbi.nlm.nih.gov/33293629/)
3. Killela PJ, Reitman ZJ, Jiao Y, Bettegowda C, Agrawal N, Diaz LA, et al. TERT promoter mutations occur frequently in gliomas and a subset of tumors derived from cells with low rates of self-renewal. *Proc Natl Acad Sci U S A.* 2013;110(15):6021–6. <https://doi.org/10.1073/pnas.1303607110> PMID: [23530248](https://pubmed.ncbi.nlm.nih.gov/23530248/)
4. An Z, Aksoy O, Zheng T, Fan Q-W, Weiss WA. Epidermal growth factor receptor and EGFRvIII in glioblastoma: Signaling pathways and targeted therapies. *Oncogene.* 2018;37(12):1561–75. <https://doi.org/10.1038/s41388-017-0045-7> PMID: [29321659](https://pubmed.ncbi.nlm.nih.gov/29321659/)
5. Verhaak RGW, Hoadley KA, Purdom E, Wang V, Qi Y, Wilkerson MD, et al. Integrated genomic analysis identifies clinically relevant subtypes of glioblastoma characterized by abnormalities in PDGFRA, IDH1, EGFR, and NF1. *Cancer Cell.* 2010;17(1):98–110. <https://doi.org/10.1016/j.ccr.2009.12.020> PMID: [20129251](https://pubmed.ncbi.nlm.nih.gov/20129251/)
6. The Cancer Genome Atlas Research Network. Comprehensive genomic characterization defines human glioblastoma genes and core pathways. *Nature.* 2008;455(7216):1061–8.
7. Brennan CW, Verhaak RGW, McKenna A, Campos B, Nounshmehr H, Salama SR, et al. The somatic genomic landscape of glioblastoma. *Cell.* 2013;155(2):462–77. <https://doi.org/10.1016/j.cell.2013.09.034> PMID: [24120142](https://pubmed.ncbi.nlm.nih.gov/24120142/)
8. Nakamura M, Yang F, Fujisawa H, Yonekawa Y, Kleihues P, Ohgaki H. Loss of heterozygosity on chromosome 19 in secondary glioblastomas. *J Neuropathol Exp Neurol.* 2000;59(6):539–43. <https://doi.org/10.1093/jnen/59.6.539> PMID: [10850866](https://pubmed.ncbi.nlm.nih.gov/10850866/)
9. Hegi ME, Diserens A-C, Gorlia T, Hamou M-F, de Tribolet N, Weller M, et al. MGMT gene silencing and benefit from temozolomide in glioblastoma. *N Engl J Med.* 2005;352(10):997–1003. <https://doi.org/10.1056/NEJMoa043331> PMID: [15758010](https://pubmed.ncbi.nlm.nih.gov/15758010/)
10. Arita H, Narita Y, Fukushima S, Tateishi K, Matsushita Y, Yoshida A, et al. Upregulating mutations in the TERT promoter commonly occur in adult malignant gliomas and are strongly associated with total 1p19q loss. *Acta Neuropathol.* 2013;126(2):267–76. <https://doi.org/10.1007/s00401-013-1141-6> PMID: [23764841](https://pubmed.ncbi.nlm.nih.gov/23764841/)
11. Stupp R, Mason WP, van den Bent MJ, Weller M, Fisher B, Taphoorn MJB, et al. Radiotherapy plus concomitant and adjuvant temozolomide for glioblastoma. *N Engl J Med.* 2005;352(10):987–96. <https://doi.org/10.1056/NEJMoa043330> PMID: [15758009](https://pubmed.ncbi.nlm.nih.gov/15758009/)
12. Johannessen T-CA, Bjerkvig R. Molecular mechanisms of temozolomide resistance in glioblastoma multiforme. *Expert Rev Anticancer Ther.* 2012;12(5):635–42. <https://doi.org/10.1586/era.12.37> PMID: [22594898](https://pubmed.ncbi.nlm.nih.gov/22594898/)
13. Singh SK, Hawkins C, Clarke ID, Squire JA, Bayani J, Hide T, et al. Identification of human brain tumour initiating cells. *Nature.* 2004;432(7015):396–401. <https://doi.org/10.1038/nature03128> PMID: [15549107](https://pubmed.ncbi.nlm.nih.gov/15549107/)
14. Patel AP, Tirosh I, Trombetta JJ, Shalek AK, Gillespie SM, Wakimoto H, et al. Single-cell RNA-seq highlights intratumoral heterogeneity in primary glioblastoma. *Science.* 2014;344(6190):1396–401. <https://doi.org/10.1126/science.1254257> PMID: [24925914](https://pubmed.ncbi.nlm.nih.gov/24925914/)
15. Arvanitis CD, Ferraro GB, Jain RK. The blood-brain barrier and blood-tumour barrier in brain tumours and metastases. *Nat Rev Cancer.* 2020;20(1):26–41. <https://doi.org/10.1038/s41568-019-0205-x> PMID: [31601988](https://pubmed.ncbi.nlm.nih.gov/31601988/)
16. Hambardzumyan D, Gutmann DH, Kettenmann H. The role of microglia and macrophages in glioma maintenance and progression. *Nat Neurosci.* 2016;19(1):20–7. <https://doi.org/10.1038/nn.4185> PMID: [26713745](https://pubmed.ncbi.nlm.nih.gov/26713745/)
17. Strickland M, Stoll EA. Metabolic Reprogramming in Glioma. *Front Cell Dev Biol.* 2017;5:43. <https://doi.org/10.3389/fcell.2017.00043> PMID: [28491867](https://pubmed.ncbi.nlm.nih.gov/28491867/)
18. Krakstad C, Chekenya M. Survival signalling and apoptosis resistance in glioblastomas: Opportunities for targeted therapeutics. *Mol Cancer.* 2010;9:135. <https://doi.org/10.1186/1476-4598-9-135> PMID: [20515495](https://pubmed.ncbi.nlm.nih.gov/20515495/)
19. Klemm F, Maas RR, Bowman RL, Kornete M, Soukup K, Nassiri S, et al. Interrogation of the microenvironmental landscape in brain tumors reveals disease-specific alterations of immune cells. *Cell.* 2020;181(7):1643–1660.e17. <https://doi.org/10.1016/j.cell.2020.05.007> PMID: [32470396](https://pubmed.ncbi.nlm.nih.gov/32470396/)

20. Subramanian H, Gupta K, Ali H. Roles of Mas-related G protein-coupled receptor X2 on mast cell-mediated host defense, pseudoallergic drug reactions, and chronic inflammatory diseases. *J Allergy Clin Immunol*. 2016;138(3):700–10. <https://doi.org/10.1016/j.jaci.2016.04.051> PMID: [27448446](https://pubmed.ncbi.nlm.nih.gov/27448446/)
21. McNeil BD, Pundir P, Meeker S, Han L, Udem BJ, Kulka M, et al. Identification of a mast-cell-specific receptor crucial for pseudo-allergic drug reactions. *Nature*. 2015;519(7542):237–41. <https://doi.org/10.1038/nature14022> PMID: [25517090](https://pubmed.ncbi.nlm.nih.gov/25517090/)
22. Azimi E, Reddy VB, Shade K-TC, Anthony RM, Talbot S, Pereira PJS, et al. Dual action of neurokinin-1 antagonists on Mas-related GPCRs. *JCI Insight*. 2016;1(16):e89362. <https://doi.org/10.1172/jci.insight.89362> PMID: [27734033](https://pubmed.ncbi.nlm.nih.gov/27734033/)
23. Manic G, Obrist F, Kroemer G, Vitale I, Galluzzi L. Chloroquine and hydroxychloroquine for cancer therapy. *Mol Cell Oncol*. 2014;1(1):e29911. <https://doi.org/10.4161/mco.29911> PMID: [27308318](https://pubmed.ncbi.nlm.nih.gov/27308318/)
24. Poole B, Ohkuma S. Effect of weak bases on the intralysosomal pH in mouse peritoneal macrophages. *J Cell Biol*. 1981;90(3):665–9. <https://doi.org/10.1083/jcb.90.3.665> PMID: [6169733](https://pubmed.ncbi.nlm.nih.gov/6169733/)
25. Klionsky DJ, Petroni G, Amaravadi RK, Baehrecke EH, Ballabio A, Boya P, et al. Autophagy in major human diseases. *EMBO J*. 2021;40(19):e108863. <https://doi.org/10.15252/emboj.2021108863> PMID: [34459017](https://pubmed.ncbi.nlm.nih.gov/34459017/)
26. Jang C-H, Choi J-H, Byun M-S, Jue D-M. Chloroquine inhibits production of TNF-alpha, IL-1beta and IL-6 from lipopolysaccharide-stimulated human monocytes/macrophages by different modes. *Rheumatology (Oxford)*. 2006;45(6):703–10. <https://doi.org/10.1093/rheumatology/kei282> PMID: [16418198](https://pubmed.ncbi.nlm.nih.gov/16418198/)
27. Weber SM, Levitz SM. Chloroquine interferes with lipopolysaccharide-induced TNF-alpha gene expression by a novel mechanism involving inhibition of ERK1/2. *Biochem Pharmacol*. 2003;66(9):1833–45.
28. Kuznik A, Bencina M, Svajger U, Jeras M, Rozman B, Jerala R. Mechanism of endosomal TLR inhibition by antimalarial drugs and imidazoquinolines. *J Immunol*. 2011;186(8):4794–804. <https://doi.org/10.4049/jimmunol.1000702> PMID: [21398612](https://pubmed.ncbi.nlm.nih.gov/21398612/)
29. Hohenberg P, Kohn W. Inhomogeneous electron gas. *Phys Rev*. 1964;136(3B):B864–71.
30. Reed AE, Weinstock RB, Weinhold F. Natural population analysis. *J Chem Phys*. 1985;83(2):735–46.
31. Murray JS, Politzer P. The electrostatic potential: An overview. *Wiley Interdiscip Rev Comput Mol Sci*. 2011;1(2):153–72.
32. Wilson EB, Decius JC, Cross PC. *Molecular vibrations: The theory of infrared and Raman vibrational spectra*. New York: McGraw-Hill. 1955.
33. Morris GM, Huey R, Lindstrom W, Sanner MF, Belew RK, Goodsell DS, et al. AutoDock4 and AutoDockTools4: Automated docking with selective receptor flexibility. *J Comput Chem*. 2009;30(16):2785–91. <https://doi.org/10.1002/jcc.21256> PMID: [19399780](https://pubmed.ncbi.nlm.nih.gov/19399780/)
34. Mukai K, Tsai M, Saito H, Galli SJ. Mast cells as sources of cytokines, chemokines, and growth factors. *Immunol Rev*. 2018;282(1):121–50. <https://doi.org/10.1111/imr.12634> PMID: [29431212](https://pubmed.ncbi.nlm.nih.gov/29431212/)
35. Levy JMM, Towers CG, Thorburn A. Targeting autophagy in cancer. *Nat Rev Cancer*. 2017;17(9):528–42. <https://doi.org/10.1038/nrc.2017.53> PMID: [28751651](https://pubmed.ncbi.nlm.nih.gov/28751651/)
36. Frisch MJ, Trucks GW, Schlegel HB, Scuseria GE, Robb MA, Cheeseman JR. Gaussian 09, Revision D.01. Wallingford CT: Gaussian, Inc. 2013.
37. Becke AD. Density-functional thermochemistry. III. The role of exact exchange. *J Chem Phys*. 1993;98(7):5648–52.
38. Foresman JB, Frisch AE. *Exploring chemistry with electronic structure methods*. Pittsburgh PA: Gaussian, Inc. 1996.
39. Wilson EB, Decius JC, Cross PC. *Molecular Vibrations: The Theory of Infrared and Raman Vibrational Spectra*. New York: McGraw-Hill. 1955.
40. Pulay P, Fogarasi G, Pang F, Boggs JE. Systematic ab initio gradient calculation of molecular geometries, force constants, and dipole moment derivatives. *J Am Chem Soc*. 1979;101(10):2550–60.
41. Scott AP, Radom L. Harmonic vibrational frequencies: an evaluation of Hartree–Fock, Møller–Plesset, quadratic configuration interaction, density functional theory, and semiempirical scale factors. *J Phys Chem*. 1996;100(41):16502–13.
42. Trott O, Olson AJ. AutoDock Vina: improving the speed and accuracy of docking with a new scoring function, efficient optimization, and multithreading. *J Comput Chem*. 2010;31(2):455–61. <https://doi.org/10.1002/jcc.21334> PMID: [19499576](https://pubmed.ncbi.nlm.nih.gov/19499576/)
43. Forli S, Huey R, Pique ME, Sanner MF, Goodsell DS, Olson AJ. Computational protein-ligand docking and virtual drug screening with the AutoDock suite. *Nat Protoc*. 2016;11(5):905–19. <https://doi.org/10.1038/nprot.2016.051> PMID: [27077332](https://pubmed.ncbi.nlm.nih.gov/27077332/)
44. Demirag AD, Çelik S, Akyüz S, Özel A. Molecular docking analysis of used drugs for the treatment of cancer. *Süleyman Demirel Üniversitesi Fen Bilimleri Enstitüsü Dergisi*. 2021;25(3):539–47. <https://doi.org/10.19113/sdufenbed.871423>
45. Çelik S, Demirag AD, Coşgun AO, Özel A, Akyüz S. Computational investigation of the interaction mechanism of some anti-alzheimer drugs with the acetylcholinesterase enzyme. *Open Journal of Nano*. 2023;8(1):11–21. <https://doi.org/10.56171/ojn.1109606>
46. Jorgensen WL, Duffy EM. Prediction of drug solubility from structure. *Adv Drug Deliv Rev*. 2002;54(3):355–66. [https://doi.org/10.1016/s0169-409x\(02\)00008-x](https://doi.org/10.1016/s0169-409x(02)00008-x) PMID: [11922952](https://pubmed.ncbi.nlm.nih.gov/11922952/)
47. Daina A, Michielin O, Zoete V. SwissADME: A free web tool to evaluate pharmacokinetics, drug-likeness and medicinal chemistry friendliness of small molecules. *Sci Rep*. 2017;7:42717. <https://doi.org/10.1038/srep42717> PMID: [28256516](https://pubmed.ncbi.nlm.nih.gov/28256516/)
48. Lipinski CA. Lead- and drug-like compounds: The rule-of-five revolution. *Drug Discov Today Technol*. 2004;1(4):337–41. <https://doi.org/10.1016/j.ddtec.2004.11.007> PMID: [24981612](https://pubmed.ncbi.nlm.nih.gov/24981612/)
49. Stuart BH. *Infrared spectroscopy: fundamentals and applications*. Hoboken, NJ: John Wiley & Sons. 2004.

50. Smith E, Dent G. *Modern Raman Spectroscopy: A Practical Approach*. Hoboken, NJ: John Wiley & Sons. 2019.
51. GraphPad Prism version 6.00. La Jolla, CA: GraphPad Software. 2012.
52. Ejuh GW, Fonkem C, Tadjouteu Assatse Y, Yossa Kamsi RA, Nya T, Ndikum LP, et al. Study of the structural, chemical descriptors and optoelectronic properties of the drugs Hydroxychloroquine and Azithromycin. *Heliyon*. 2020;6(8):e04647. <https://doi.org/10.1016/j.heliyon.2020.e04647> PMID: [32802983](https://pubmed.ncbi.nlm.nih.gov/32802983/)
53. Chafai N, Chafaa S, Bensouici A, Hellal A. Quantum chemical study of hydroxychloroquine and chloroquine. *J Mol Struct*. 2022;1265:133381.
54. Liu XY, Wang WN, Wang X, Li HF. First-principles DFT investigations of the vibrational spectra of chloroquine and hydroxychloroquine. *J Phys Commun*. 2021;5(4):045011.
55. Rosenfeld MR, Ye X, Supko JG, Desideri S, Grossman SA, Brem S, et al. A phase I/II trial of hydroxychloroquine in conjunction with radiation therapy and concurrent and adjuvant temozolomide in patients with newly diagnosed glioblastoma multiforme. *Autophagy*. 2014;10(8):1359–68. <https://doi.org/10.4161/auto.28984> PMID: [24991840](https://pubmed.ncbi.nlm.nih.gov/24991840/)
56. Compter AH, Roes EMJ, van der Valk P, Lycklama à Nijeholt GJ, Bloemendal HJ, et al. Phase II study of chloroquine and hydroxychloroquine in glioblastoma patients. *J Neurooncol*. 2021;152(3):505–14.
